# Supplementary material for: Characterization of ddx4 and dnd Homologs in Snakeskin Gourami (Trichopodus pectoralis) and Their Expression Levels during Larval Development and in Gonads of Males and Females
Source: MDPI journal article supplement (doi:10.3390/ani12233415), 2022-12-04
Supplement: s1 [file s1]

**SlA.** Multiple alignment of amino acid of the known piscine Ddx4 protein homologs and location of degenerate primer design. *C. carpio*, AF479820.2; *L. japonicus*, JQ756458.1; *E. fuscoguttatus*, KU695222.1; *D. labrax*, GU987023.1; *T. orientalis*, ABY77970.1; *T. maccoyii*, KP171241.1; *O. qoramy*, GQ422440.1; *L. calcarifer*, XM 018704462.1

|                         |                                                                 |     |
|-------------------------|-----------------------------------------------------------------|-----|
| <i>C. carpio</i>        | LMACAQTGSGKTA AFLLPILQRFMTDGVAA SKFSEIQEPEAII VAPTRELINQIYLEARK | 352 |
| <i>D. labrax</i>        | LMACAQTGSGKTA AFLLPILQQLMADGVAASS FSELQEPEAVIVAPTRELINQIYLEARK  | 299 |
| <i>E. fuscoguttatus</i> | LMACAQTGSGKTA AFLLPILQQLMADGVAASS FSELQEPETIIVAPTRELINQIFLEARK  | 306 |
| <i>T. orientalis</i>    | LMACAQTGSGKTA AFLLPILQQLMADGVAAS RFSELQEPEAII VAPTRELINQIYLEARK | 307 |
| <i>T. maccoyii</i>      | LMACAQTGSGKTA AFLLPILQQLMADGVAAS RFSELQEPEAII VAPTRELINQIYLEARK | 306 |
| <i>O. goramy</i>        | LMACAQTGSGKTA AFLLPILQQLMADGVAAS RFSELQEPEALIVAPTRELINQIYLEARK  | 317 |
| <i>L. japonicus</i>     | LMACAQTGSGKTA AFLLPILQQLMADGVAAS RFSELQEPEAII VAPTRELINQIYLEARK | 296 |
| <i>L. calcarifer</i>    | LMACAQTGSGKTA AFLLPILQQLMADGVAAS RFSELQEPEAII VAPTRELINQIYLEARK | 310 |
|                         | ***** . . . ***** * * . * * . . . ***** *                       |     |

|                         |                                                             |     |
|-------------------------|-------------------------------------------------------------|-----|
| <i>C. carpio</i>        | FAYGTCVRPVVYGGINTGYTIREVLKGCNVLCATPGRLHDLIGRGKIGLSKVRYLVLDE | 412 |
| <i>D. labrax</i>        | FAFGTCVRPVVYGGVSTGHQIREISRGCNVLCGTPGRLLDVIGRGKVGLSKVRVFLDE  | 359 |
| <i>E. fuscoguttatus</i> | FAFGTCVRPVVYGGVSTGHQIREICRGCNVVCCTPGRLLDVIGRGKIGLSKLRYLVLDE | 366 |
| <i>T. orientalis</i>    | FAFGTCVRPVVYGGVSTGHQIREIERGCNVVCGTPGRLLDMIGRGKVGLSKLRYLVLDE | 367 |
| <i>T. maccoyii</i>      | FAFGTCVRPVVYGGVSTGHQIREIERGCNVVCGTPGRLLDMIGRGKVGLSKLRYLVLDE | 366 |
| <i>O. goramy</i>        | FSFGTCVRPVVYGGVSTAHQIREISRGCNVLCGTPGRLLDVIGRGKVGLSKLRYLVLDE | 377 |
| <i>L. japonicus</i>     | FAFGTCVCPVVYGGASTGHQIREISRGCNVLCGTPGRLLDMIGRGKVGLSKLRYFLVDE | 356 |
| <i>L. calcarifer</i>    | FAFGTCVRPVVYGGVSTGYQIREISRGCNVLCGTPGRLLDMIGRGKVGLQKLRYLVLDE | 370 |

\*.:\*\*\*\* \*\*\*\*\* .\*.: \*\*\*: :\*\*\*\*:\*.\*\*\*\*\* \*:\*\*\*\*\*:\*.\*:\*\*:\*

|                         |                                                              |     |
|-------------------------|--------------------------------------------------------------|-----|
| <i>C. carpio</i>        | ADRMLDMDMGFEPMRKLVGSPGMPSKEDRQTLMFSAATYPEDIQRMAADFLKVDYIFLAV | 472 |
| <i>D. labrax</i>        | ADRMLD--MGFEPMRRLVGSPGMPSKENRQTLMFSAATYPEDIQRMAADFLKTDYFLAV  | 417 |
| <i>E. fuscoguttatus</i> | ADRMLD--MGFEPMRRLVGSPGMPPKESRQTLMFSAATYPEDIQRMAADFLKTDYFLAV  | 424 |
| <i>T. orientalis</i>    | ADRMLD--MGFEPMRRLVGSPGMPSKENRQTLMFSAATYPEDIQRMAADFLKTDYFLAV  | 425 |
| <i>T. maccoyii</i>      | ADRMLD--MGFEPMRRLVGSPGMPSKENRQTLMFSAATYPEDIQRMAADFLKTDYFLAV  | 424 |
| <i>O. goramy</i>        | ADRMLD--MGFEPMRRLVGSPGMPSKENRQTLMFSAATYPEDIQRMAADFLKTDYFLAV  | 435 |
| <i>L. japonicus</i>     | ADRMLD--MGFEPMRRLVGSPGMPSKENRQTLMFSAATYPEDIQRMAADFLKTDYFLAV  | 414 |
| <i>L. calcarifer</i>    | ADRMLD--MGFEPMRRLVGSPGMPSKEDRQTLMFSAATYPEDIQRMAADFLKTDYFLAV  | 428 |

\*\*\*\*\* \*\*\*\*\*:\*\*\*\*\* \*\* .\*\*\*\*\* \*\*\*\*\* .\*:\*\*\*\*

|                         |                                                              |     |
|-------------------------|--------------------------------------------------------------|-----|
| <i>C. carpio</i>        | GVVGGACSDVEQTIVQVTS--TKRDQLELLLRSTGNERTMVFVETKRSADFIATFLCQEK | 531 |
| <i>D. labrax</i>        | GVVGGACSDVEQTFVQVTKFSKREQLLDLLKTTGMERTMVFVETKRQADFIATYLCQEK  | 477 |
| <i>E. fuscoguttatus</i> | GIVGGACSDVEQSFVQVTKFSKREQLLDLLKTTGTERTMVFVETKRQADFIATYLCQEK  | 484 |
| <i>T. orientalis</i>    | GVVGGACSDVEQTFIQVTKFSKREQLLDLLKTTGTERTMVFVETKRQADFIATFLCQEK  | 485 |
| <i>T. maccoyii</i>      | GVVGGACSDVEQTFIQVTKFSKREQLLDLLKTTGTERTMVFVETKRQADFIATFLCQEK  | 484 |
| <i>O. goramy</i>        | GVVGGACSDVEQTFVQVTKFSKREQLLDLLKTTGTERTMVFVETKRQADFIATFLCQEK  | 495 |
| <i>L. japonicus</i>     | GVVGGACSDVEQTFVQVTKFSKREQLLDLLKTTGTERTMVFVETKRQADFIATYLCQEK  | 474 |
| <i>L. calcarifer</i>    | GVVGGACSDVEQTFIEVTKFSKREQLLDLLKTTGTERTMVFVETKRQADFIATFLCQEK  | 488 |

\*:\*\*\*\*\*:.:\*. :\*:\*\*\*:\*. :\* \*\*\*\*\* .\*\*\*\*\*:\*\*\*\*\*:

|                         |                                                            |     |
|-------------------------|------------------------------------------------------------|-----|
| <i>C. carpio</i>        | STTSIHGDREQREREKALSDFRTGQCPVLVATSVAAAGLDIEQVQHVNFDPSSIDEYV | 591 |
| <i>D. labrax</i>        | PTTSIHGDREQREREQALADFRSGKCPVLVATSVAAAGLDIPDVQHVNFDPNNIDEYV | 537 |
| <i>E. fuscoguttatus</i> | PTTSIHGDREQREREQALADFRSGKCPVLVATSVAAAGLDIPDVQHVNFDPNNIDEYV | 544 |
| <i>T. orientalis</i>    | PTTSIHGDREQREREQALADFRSGKCPVLVATSVAAAGLDIPDVQHVNFDPNNIDEYV | 545 |
| <i>T. maccoyii</i>      | PTTSIHGDREQREREQALADFRSGKCPVLVATSVAAAGLDIPDVQHVNFDPNNIDEYV | 544 |
| <i>O. goramy</i>        | PTTSIHGDREQREREQALADFRSGKCPVLVATSVAAAGLDIPDVQHVNFDPNNIDEYV | 555 |
| <i>L. japonicus</i>     | PTTSIHGDREQREREQALADFRSGKCPVLVATSVAAAGLDIPDVQHVNFDPNNIDEYV | 534 |
| <i>L. calcarifer</i>    | PTTSIHGDREQREREQALADFRSGKCPVLVATSVAAAGLDIPDVQHVNFDPNNIDEYV | 548 |

\*\*\*\*\*:\*.\*\*\*:\*.\*\*\*\*\*:\*\*\*\*\*:\*\*\*\*\*:\*\*\*\*\*:\*\*\*\*\*

### Tpe-ddx4R2

### Tpe-ddx4R1

|                         |                                                               |     |
|-------------------------|---------------------------------------------------------------|-----|
| <i>C. carpio</i>        | HRIGRTGRCGNIGRAVSFFNPESDTPLARSLVKVLSGAQQEVPKWLEEIAFSAHG-TTGF  | 650 |
| <i>D. labrax</i>        | HRIGRTGRCGNTGRAVSFFDPDSDQLARSLVTILSKAQEVPSWLEDSAFSGPGSM--G    | 595 |
| <i>E. fuscoguttatus</i> | HRIGRTGRCGNTGRAVSFYDPDNDQLARSLVTILSKAQEVPAWLEESAFSGGGGSGF     | 604 |
| <i>T. orientalis</i>    | HRIGRTGRCGNTGRAVSFYDPDADGQLARSLVTVLSKAQQEVPSWLEESAFSGP-ATTGF  | 604 |
| <i>T. maccoyii</i>      | HRIGRTGRCGNTGRAVSFYDPDADGQLARSLVTVLSKAQQEVPSWLEESAFSGP-ATTGF  | 603 |
| <i>O. goramy</i>        | HRIGRTGRCGNTGRAVSFYDPEADGHLARSLVGVLSKAQQEVPSWLEEAFAFGP-SSTGF  | 614 |
| <i>L. japonicus</i>     | HRIGRTGRCGNTGRAVSFYDPDADGQLARSLVTVLSKAQQEVPSWLEEFASFSGP-ATTGF | 593 |
| <i>L. calcarifer</i>    | HRIGRTGRCGNVGRAVSFYDPDADVQLARSLVTVLSKAQQVPSWLEEHAFSGL--STGF   | 606 |

\*\*\*\*\* \*\*\*\*\*:\*. :\* \*\*\*\*\* :\*\* \*\* \*\* \*\* \*\* \*\* :\*\*\*

|                         |                                              |     |
|-------------------------|----------------------------------------------|-----|
| <i>C. carpio</i>        | NPRGKVFASTDRKG---GSFKTDEPPQASAPSPAAAADDEEWE  | 691 |
| <i>D. labrax</i>        | VAPRKTFASSDSRKGPQGGSVQDSDV-QSQSAAQTAH-DEEWD  | 637 |
| <i>E. fuscoguttatus</i> | NAPRKSFASDTSRK---GGSSQDNSV-KSPPAQSAN-DEEWE   | 643 |
| <i>T. orientalis</i>    | NPPRKNFASTDSRK---RGSFQDNSV-KSQPAVQTAADDDEEWE | 644 |
| <i>T. maccoyii</i>      | NPPRKNFASTDSRK---RGSFQDNSV-KSQPAVQTAADDDEEWE | 643 |
| <i>O. goramy</i>        | NPPRKNFASTDRQ---RGLLQDTSV-MSQPAAPQAA-DEEWE   | 653 |
| <i>L. japonicus</i>     | NPPRKNFASTDSRK---GGSFQDNMG-ESLPAAQAAA-DEEWE  | 632 |
| <i>L. calcarifer</i>    | NPPRKNFASTDSRK---GGSFQDNMM-KSQPAALAAA-DEEWE  | 645 |

\* \*\*\*:\*. :\* : : \* \*:\*\*\*:

**S1B.** Nucleotide alignment of the known piscine ddx4 homologs degenerate oligonucleotide primer design for cloning of *ddx4*. *C. carpio*, AF479820.2; *L. japonicus*, JQ756458.1; *E. fuscoguttatus*, KU695222.1; *D. labrax*, GU987023.1; *T. orientalis*, ABY77970.1; *T. maccoyii*, KP171241.1; *O. goramy*, GQ422440.1; *L. calcarifer*, XM\_018704462.1

```

D.labrax      -----
L.japonicus   -----
T.orientalis  -----
T.maccoyii    -----
O.goramy      -----
L.calcarifer  -----
E.fuscoguttatus -----
C.carpio      ATGGATGACTGGGAGGAAGATCAGGGCCCTGTTGTATCCTGCAGTTCAGGTTTTGGTCTG

```

```

D.labrax      ----ATGGATGAGTGGGAAGAAGAGGGAACACTATTACTAGCACTACCACACTAACCAC
L.japonicus   ----ATGGACGAATGGGAAGAAGAAGGAACCTCC---TACAAGTACTATAACACTAACCAG
T.orientalis  ----ATGGATGAGTGGGAAGAAGAGGGAAATACT-----AGCACTATTACACTAACCAG
T.maccoyii    ----ATGGATGAGTGGGAAGAAGAGGGAAATACT-----AGCACTATTACACTAACCAG
O.goramy      ----ATGGATGAGTGGGAAGAAGAGGAAACTACTACTATTAGTACTATCGCACTAACCAG
L.calcarifer  ----ATGGATGATTGGGATGAAGAGGCAACTGCT---ACCAGTGCTATTACACTAACCAG
E.fuscoguttatus ----ATGGACGAGTGGGAAGAAGAGGGAACCTACC---ACTAGTACTATTGCACCAACCAG
C.carpio      AGCTCTAGAGGTGCAGACGGAGGATTCAAGAGCTTTTA-TACAGGAAGTACAGGAAACGG
                *  *  *      *  *  *  *  *      *      *  *  *  *  *

```

```

D.labrax      CACT-----AGTGAAGGCAGACAAGAAGGGTCTTGAATAC---TGCCAATGGTGAATC
L.japonicus   CCAC-----ACCT---CAAGTGAAGGTTGTGGTGAAGAG----GCAGACGAGGAGGA
T.orientalis  CCGCACCTCAAGTGAAGGCACACAAGGAGACTTCTGGAACAC---CAATGGTGGTGAATT
T.maccoyii    CCACACCTCAAGTGAAGGCACACAAGGAGACTTCTGGAACAC---CAATGGTGGTGAATT
O.goramy      TCAAAGCACAAATGAAGGCACTCAAGGAGATTCTGGAACAC---AGACAGCGGTGAATC
L.calcarifer  CCACACCTCAAATGAAGTCACACAAGGAGACTCATGGAACGC---TGGTGGTGGTGAATT
E.fuscoguttatus C-----CAAGGAGATACCTGGAACAC---TGGTGGTGGGAGAATT
C.carpio      GAAGGCCAAACAATGAAGATGGTGATGGTGGCTCATGGAAGACGACTGCTGGTGGTGGATT
                                *****                      *  *

```

```

D.labrax      T---GGAAGGGGTCGTGGTGGGAAGGGGCAGAGG-----AGGAGGATTTAAAAGCTCATT
L.japonicus   T---TTAAAAGCTTGTTCTCTTCAGG--TGGTG-----ACGAGAATCAGAA-----
T.orientalis  T---GGAAGGGGTCGCGGTGGAAGAGGCAGAGGGAG---AGGAGGATTTAAAAGCTCATA
T.maccoyii    T---GGAAGAGGTCGCGGTGGAAGAGGCAGAGGGAG---AGGAGGATTTAAAAGCTCATA
O.goramy      T---GGAAGGGGTCGTGGAGGTGGAGGCAGAGGAAGACGAGGAGGATTCAAAGCTCATT
L.calcarifer  T---GGAGGGGTCGCGGTGGAAGAGGCAAAGGCAGACGAGGGGGATTTACAAGCTCATT
E.fuscoguttatus T---AGCAGGGGTCGTGGTGGGAAGAGGCAGAGGCAGACACAAGGAGGATTTAAAAGCTCGTT
C.carpio      CAGGGGCAGAGGAGGCAGGGGAGGATCACGAGGAGGAAGAGGAGCTTCAGAAATACCTT
                *      *                        *  *  *  *  *

```

```

D.labrax      CTCCTC-----AGATGGCGACAACCTGGAACAGTACAGCTGGAGA
L.japonicus   -----TGATGGGGACAACCTGGAACAATACAGGTGGAGA
T.orientalis  CTCCTCAGGTGGAGATGGGA-----ATGATGAGGACAAATGGAACAATGCAGGAGGAGA
T.maccoyii    CTCCTCAGGTGGAGATGGGA-----ATGATGAGGACAAATGGAACAATGCAGGAGGAGA
O.goramy      CTCCTCAGGAGGTGAGGAGAGAAGGGATGATGGGAACAACCTGGAACAGTACAGCAGCAGA
L.calcarifer  CTC-----AGGTGATGAGA-----ATGGGAATGACAGCTGGAACAATACAGGAGGGGA
E.fuscoguttatus CTCCTCAGGTGGTGGTATGAGAATGGGAACGATCAGGACACTTGAACCATGCAGGAGGAGA
C.carpio      TAAATCAGAAACTGATGAAAATGGCAACGATGAGGGTTGGAAAAATGGTGAAGGCCAAGG
                                *      *  *  *  *  *

```

```

D.labrax      AAGAGGT-----TTTAGAGGTAGA-----GGAGG---CAGAGGGCGTGGCAGAGG
L.japonicus   AAGAGGT-----GGTTTCAGAGGTAGA-----GGAGG---CAGAGGGCGTGGCAGGGG
T.orientalis  AAGAGGT-----GGTTTCAGAGGTAGA-----GGAGG---CCAAGGGCGCGGCAGAGG
T.maccoyii    AAGAGGT-----GGTTTCAGAGGTAGA-----GGAGG---CCAAGGGCGCGGCAGAGG
O.goramy      AAGAGGT-----GGTTTCAGAGGTAGA-----GGAGG---CCGAGGTGCTGGCAGAGG
L.calcarifer  AAGAGGT-----GGTTTCAGAGATAGA-----GGCGG---TCGAGGGCGTGGCAGAGG
E.fuscoguttatus CAGAGGT-----GGTTTCAGAGGGAGA-----GGAGGACGCAGAGGGCGCGGCAGAGG
C.carpio      AAGAGGTGCTGGTGGTTTTCCGTGGTGGTTTTCCGCGGGGGTTTTCCGCGGTGGTTTTCCGTGA
                *****      *  *  *  *  *      *  *  *  *  *

```

|                        |                                                              |
|------------------------|--------------------------------------------------------------|
| <i>D.labrax</i>        | ATTCAGCC--GAACGGATCGCAGTGAA----TTCAATGAGGATGACAATCAAGTGTGTGA |
| <i>L.japonicus</i>     | ATTTGACA--GAAGGGATCGCAGTGAA----TTCAATGAAAACATGATGGAGTGTGTGA  |
| <i>T.orientalis</i>    | ATTTTGCA--GAATGGATCAAAGTGAA----TTCAATGGAGATGACAATGGAATGCGTGA |
| <i>T.maccoyii</i>      | ATTTTGCA--GAATGGATCAAAGTGAA----TTCAATGGAGATGACAATGGAATGCGTGA |
| <i>O.goramy</i>        | ATTTGGTC--GAATGGATCAGAGTGAA----TTCAACGGTGATGACAGTGGAGTGTGTGA |
| <i>L.calcarifer</i>    | ATTTTGCA--GAACGGATCCGAGTGAA----TTCACTGGAGATGACGATGGAGTGTGTGA |
| <i>E.fuscoguttatus</i> | ATTTGGCG--GGACGGATGGCAGTGAA----TTCAGTGGAGATGATAATGGAGTGTGTGA |
| <i>C.carpio</i>        | AGGTGGCAATGAAGAGACTGGGAAAAAGGCTTTGGAAGAGAAAATGACGGAAATGGCAC  |

\*                   \*   \*   \*                   \*                   \*                   \*                   \*

|                        |                                                             |
|------------------------|-------------------------------------------------------------|
| <i>D.labrax</i>        | AAATGG-----GGGAGGCAGCCAGGCGGCAGAGGAGGCAGAGGAGG-----         |
| <i>L.japonicus</i>     | AAATGGCTTTAGGGGAGGAAGCAGAGGAGGAAGAGGTGGCAGAGGAGGA-----GG--- |
| <i>T.orientalis</i>    | AAATGGGT---ATAGAGGAGGAAGAGGGGGCAGAGGAAGAGGAGGAGG-----       |
| <i>T.maccoyii</i>      | AAATGGGT---ATAGAGGAGGAAGAGGGGGCAGAGGAAGAGGAGGAGG-----       |
| <i>O.goramy</i>        | AAGTGGGTTTAGAGGAGGAAGCCGAGGTGGAAGAGGCAGCAGAGGAAGA-----GGAGG |
| <i>L.calcarifer</i>    | AAATGGGTTTAGAGGAGGAAGCCGAGGAGGAAGAGGCAGCAGAGGAGGT-----CGAGG |
| <i>E.fuscoguttatus</i> | AAATGGGTTTAGAGGAGGAAGCCGAGGAGGAAGAGGCGGCAGAGG-----          |
| <i>C.carpio</i>        | AGATGGGGGTTGGAAGGAGGTGAAGGCCGAGGAATAGGTCGTGGAGGCTTCCGTGGGGG |

\*   \*\*\*                   \*\*\*   \*                   \*\*\*   \*   \*\*                   \*   \*   \*\*

|                        |                                                              |
|------------------------|--------------------------------------------------------------|
| <i>D.labrax</i>        | TTTCAGATCAGGTGGTGAC--CAAGGTTGCAG----AGGAGGATTTGG--AGGAGGCTA  |
| <i>L.japonicus</i>     | TTTCAGACAAGGTGGTGAC--CAGGGTGGCAA----AGGAGGCTTTGG--AGGAGGCTA  |
| <i>T.orientalis</i>    | TTTCAGCCAAGGTGGCGAC--CAGGGTGGCAG----AGGAGGCTTTGG--AGGAGGTTA  |
| <i>T.maccoyii</i>      | TTTCAGCCAAGGTGGCGAC--CAGGGTGGCAG----AGGAGGCTTTGG--AGGAGGTTA  |
| <i>O.goramy</i>        | CTTCAGAGAAGCTGGTGAC--CAGGGTGGCAG----AGGAGGCTATGG--AGGAGGCTA  |
| <i>L.calcarifer</i>    | TTTCAGACAAGGTGGTGAG--CGGGGTGGCAG----AGGAGGCTTTGG--AGGAGGTTA  |
| <i>E.fuscoguttatus</i> | TTTCAGACAAGGTGGTGAC--CAGGGTGGCAG----AGGAGGCTTTGG--AGGAGGCTA  |
| <i>C.carpio</i>        | CTTCCGTGATGGTAGTGGTGATGAGGAGACAGGAAAAAGAGGCTTTGGTAGAGGAGGTTT |

\*\*\*   \*                   \*   \*   \*                   \*\*   \*\*                   \*   \*\*\*\*   \*   \*\*\*                   \*\*\*\*\*   \*

|                        |                                                               |
|------------------------|---------------------------------------------------------------|
| <i>D.labrax</i>        | CCGTGGAAGATGAGGAGGTCTTTTCTCAACG---GGAAGATAAAGA-----AAATAA     |
| <i>L.japonicus</i>     | CCGTGGAAGATGAGGAGATATTTGCTCAACGTGGGGAAGATAAAGA-----AAAGAA     |
| <i>T.orientalis</i>    | TCGTGGAAGATGAGGAGATCTTTACTCGAGG---GGAAGATAAAGA-----TCCAGA     |
| <i>T.maccoyii</i>      | TCGTGGAAGATGAGGAGATCTTTACTCGAGG---GGAAGATAAAGA-----TCCAGA     |
| <i>O.goramy</i>        | CCGTGGAAGATGAAGAGATCTTTGCTCAAGG---GGAAGATAAAGACCCAGGAAAGAA    |
| <i>L.calcarifer</i>    | CAGAGGAAAAGATGAACAGGTCTTTGCTCAAGG---GGAAGATAAAGATCC---AGGGAA  |
| <i>E.fuscoguttatus</i> | CCGTGGGAAAAGATGAGGAGGTCTTTGCTAAAGG---GGATGACAGAGATCC---AGAGAA |
| <i>C.carpio</i>        | CAGAGCCGGAATGAGGAAGTGTTTTC-CAAGGCCTCAACAGCAGACAAGCC--AGATCC   |

\*   \*\*                   \*\*\*\*   \*   \*   \*\*\*   \*                   \*                   \*                   \*   \*   \*

|                        |                                                              |
|------------------------|--------------------------------------------------------------|
| <i>D.labrax</i>        | GGATGCAACCGATGGTGAAAGACCAAGGGTCACATATATTCCCCAACCCCTCCCTGAAGA |
| <i>L.japonicus</i>     | GGATGCAAGTGATGGTGACAGACCGAAGGTCACGTATGTTCCCCAACCCCTCCCTGAAGA |
| <i>T.orientalis</i>    | AAAGAAGGACGATAGTGACAGACCAAAGATCACATATGTTCCCCAACCCCTCCCTGAAGA |
| <i>T.maccoyii</i>      | AAAGAAGGATGATAGTGACAGACCAAAGATCACATATGTTCCCCAACCCCTCCCTGAAGA |
| <i>O.goramy</i>        | GGATGCGATCGATGGTGACAGACCGAAGGTAACATACGTTCCCCAACACTCCCTGAAGA  |
| <i>L.calcarifer</i>    | TGATGCAAGTGAGGGTGACAGACCAAAGATCACATACATTCCACCAACCCTACCTGAAGA |
| <i>E.fuscoguttatus</i> | GGATGCAGGCGATGGTGACAAGCCAAAGGTCACGTATATTCCCCGTCCCTTCCCTGATGA |
| <i>C.carpio</i>        | AGAAGCAGGTGAAAATGCAGGACCAAGGTTGTCTATGTGCCGCCTCCCCCTCCAGAAGA  |

\*                   \*\*   \*\*                   \*   \*   \*   \*                   \*\*   \*   \*   \*                   \*   \*   \*   \*   \*

**Tpe-ddx4F1**

**5' -GAYGABAT**

|                        |                                                               |
|------------------------|---------------------------------------------------------------|
| <i>D.labrax</i>        | TGAAGACTCCATTTTTGCCCACTATGAGACGGGCATCAACTTTGACAAGTATGATGACAT  |
| <i>L.japonicus</i>     | TGAAGACTCCATTTTTTCCCACTATGAGACGGGCATCAACTTTGACAAGTATGATGACAT  |
| <i>T.orientalis</i>    | TGAGGACTCCATTTTTTCCCACTATGAAACAGGGATCAACTTTGACAAGTATGATGACAT  |
| <i>T.maccoyii</i>      | TGAGGACTCCATTTTTTCCCACTATGAAACAGGGATCAACTTTGACAAGTATGATGACAT  |
| <i>O.goramy</i>        | CGAAGACTCCATTTTTGCACACTACAAGACAGGCATCAACTTTGACAAATATGATGACAT  |
| <i>L.calcarifer</i>    | CGAAGACGCCGTGTTTGCCCCACTACGAGACAGGCATTAACTTTGATAAGTATGACGACAT |
| <i>E.fuscoguttatus</i> | CGAAGACTCCATTTTCGCCCCACTACGAGTCAGGCATCAACTTCGACAAGTATGATGACAT |
| <i>C.carpio</i>        | GGAGAGTTCCATATTTTCCCATATGCCTCAGGCATTAATTTTGACAAATATGATGACAT   |

\*\*                   \*\*   \*   \*\*                   \*   \*   \*                   \*   \*   \*   \*   \*   \*   \*   \*   \*   \*   \*   \*   \*   \*   \*   \*   \*   \*   \*   \*   \*

**MHTKGTVGAYGTBAGYGG-3'**

*D. labrax* CCTGGTGGATGTCAGTGGAGCCAATCCACCACAGGCTATAATGACTTTTGGATGAGGCAGG  
*L. japonicus* CATGGTGGATGTCAGTGGTACCAACCCACCGCAGGCTATCATGACCTTTGATGAGGCAGC  
*T. orientalis* CATGGTGGATGTTAGTGGAAACCAATCCACCACAAGCTGTCATGACTTTTGGATGAGGCAGC  
*T. maccoyii* CATGGTGGATGTTAGTGGAAACCAATCCACCACAAGCTGTCATGACTTTTGGATGAGGCAGC  
*O. goramy* AATGGTGGATGTCAGCGGAACCAACCCACCACAGGCAATCCTGACCTTTGATGAGGCGGC  
*L. calcarifer* TATGGTTGATGTCAGTGGAAACCAATCCACCAGAGGCACTCATGACTTTTGGATGAGGCAAT  
*E. fuscoguttatus* CATGGTAGACGTCAGTGGAAACCAACCCACCACAGGCCATCATGACTTTTCGACGAGGCAGC  
*C. carpio* CCTTGTGGATGTGAGTGGCAGCAATCCTCCAAAGGCTATTATGACTTTTGGATGAAGCAGG  
 \* \* \* \* \*

**Tpe-ddx4F2****5' -AAGCCBACYCCDGT**

*D. labrax* ATTGTGTGAGTCGCTGAGAAAAACAGTCAGCAAGTCTGGTTATGTGAAGCCGACCCCTGT  
*L. japonicus* ATTGTGCGAGTCCCTGAGAAAAACGTCAGCAAATCTGGTTATGTAAAGCCGACCCCTGT  
*T. orientalis* ATTGTGCGAGTCCCTGAGAAAAACGTCAGCAAGTCTGGTTATGTGAAGCCGACCCCTGT  
*T. maccoyii* ATTGTGCGAGTCCCTGAGAAAAACGTCAGCAAGTCTGGTTATGTGAAGCCGACCCCTGT  
*O. goramy* GTTGTGCGAGACCCCTGAGAAAAACGTCAGCAAGTCTGGCTATGTGAAGCCACCCCTGT  
*L. calcarifer* GTTGTGCGAATCCCTGAGAAAAACGTCAGCAAGTCTGGTTACGTGAAGCCGACCCCTGT  
*E. fuscoguttatus* GTTGTGCGAGTCCCTGAGAAAAACATCAAGAAGTCTGGTTACGTGAAGCCGACCCCTGT  
*C. carpio* ACTTTGTGAATCACTGAGAAAGATGTAACGAAGTCTGGATATGTGAAGCCTACTCCTGT  
 \* \* \* \* \*

**VCAGAARYAYGG-3'**

*D. labrax* GCAGAAGCATGGCATTCCAATCATCTCTGCTGGTAGAGATCTTATGGCCTGTGCCAGAC  
*L. japonicus* TCAGAAGCACGGCATCCAATCATCTCTGCTGGCAGAGATCTCATGGCCTGTGCCAAAC  
*T. orientalis* GCAGAAGCACGGCATCCAATCATCTCTGCTGGTAGAGATCTCATGGCCTGTGCCAGAC  
*T. maccoyii* GCAGAAGCACGGCATCCAATCATCTCTGCTGGTAGAGATCTCATGGCCTGTGCCAGAC  
*O. goramy* GCAGAAGCACGGTATTCCAATCATTTCTGCCGGCAGAGATCTCATGGCCTGCGCCAGAC  
*L. calcarifer* GCAGAAGCATGGCATCCCGATCATCTCTGCCGGCAGAGATCTCATGGCCTGTGCCAGAC  
*E. fuscoguttatus* GCAGAAGTACGGCATCCCGATCATCTCTGCCGGCAGAGATCTCATGGCCTGTGCCAGAC  
*C. carpio* CCAGAAACATGGAATCCCATATTCTGCTGGAAGAGATCTAATGGCTTGTGCCAGAC  
 \* \* \* \* \*

*D. labrax* TGGATCTGGTAAAACGGCTGCTTTCCTGCTCCCTATTCTGCAGCAGCTGATGGCAGACGG  
*L. japonicus* TGGATCTGGTAAAACGGCTGCATTCTGCTCCCTATTCTGCAGCAACTGATGGCAGACGG  
*T. orientalis* TGGATCTGGTAAAACGGCTGCATTCTGCTCCCTATTCTGCAGCAGCTGATGGCAGATGG  
*T. maccoyii* TGGATCTGGTAAAACGGCTGCATTCTGCTCCCTATTCTGCAGCAGCTGATGGCAGATGG  
*O. goramy* TGGATCGGGCAAAAACGGCTGCGTTCTGCTCCCAATTCTGCAGCAGCTGATGGCAGACGG  
*L. calcarifer* TGGATCTGGTAAAACGGCTGCGTTCTTCTCCCAATTCTGCAGCAGCTGATGGCGACGG  
*E. fuscoguttatus* TGGATCTGGTAAAACGGCTGCGTTCTGCTCCCAATTCTGCAGCAGCTGATGGCAGACGG  
*C. carpio* CGGGTCAGGAAAAACGGCGGCTTCTGCTGCCCATCCTACAGCGCTTTATGACTGATGG  
 \* \* \* \* \*

*D. labrax* TGTGGCAGCCAGTTCCCTCAGTGAGCTGCAGGAGCCTGAAGCCGTCATCGTGGCTCCAAC  
*L. japonicus* TGTGGCAGCCAGTCGTTTTCAGTGAGCTGCAGGAGCCTGAAGCCATCATTGTGGCCCCAAC  
*T. orientalis* TGTGGCAGCAAGTCGCTTCAGCGAGCTGCAGGAGCCTGAAGCAATCATTGTGGCCCCAAC  
*T. maccoyii* TGTGGCAGCAAGTCGCTTCAGCGAGCTGCAGGAGCCTGAAGCAATCATTGTGGCCCCAAC  
*O. goramy* AGTGGCAGCCAGTCGCTTCAGTGAGCTGCAGGAGCCTGAAGCTCTCATTGTGGCCCCGAC  
*L. calcarifer* TGTGGCAGCCAGTCGCTTCAGTGAGCTGCAGGAGCCTGAGGCCATCATTGTGGCCCCAAC  
*E. fuscoguttatus* TGTGGCAGCCAGTAGCTTCAGCGAGCTGCAGGAGCCTGAGACCATCATCGTGGCCCCGAC  
*C. carpio* TGTGGCAGCCAGCAAGTTTCAGTGAGATACAGGAGCCTGAGGCCATAATCGTGGCTCCAC  
 \* \* \* \* \*

*D. labrax* TAGGGAGCTCATCAACCAGATTTACCTAGAGGCCAGGAAGTTTCGCCTTTGGGACATGTGT  
*L. japonicus* TAGGGAGCTCATCAACCAGATTTACCTGGAAGCCAGGAAGTTTGCCCTTTGGGACATGTGT  
*T. orientalis* CAGGGAGCTCATCAACCAGATTTACCTGGAGGCCAGGAAGTTTGCCCTTTGGGACATGTGT  
*T. maccoyii* CAGGGAGCTCATCAACCAGATTTACCTGGAGGCCAGGAAGTTTGCCCTTTGGGACATGTGT  
*O. goramy* CAGGGAGCTCATCAACCAGATTTACCTGGAGGCCAGGAAGTTTTCATTTGGGACGTGTGT  
*L. calcarifer* CAGGGAGCTCATCAATCAGATTTACCTAGAGGCCAGGAAGTTTGCTTTTCGGGACGTGTGT  
*E. fuscoguttatus* CAGAGAACTCATCAACCAGATCTTCTGAGGCCAGGAAGTTTGCCCTTTGGGACATGTGT  
*C. carpio* CAGAGAACTTATCAATCAGATCTATCTGGAGGCCAGGAAGTTTGATACGGGACCTGTGT  
 \* \* \* \* \*

|                         |                                                              |
|-------------------------|--------------------------------------------------------------|
| <i>D. labrax</i>        | CGGTCCAGTAGTAGTCTATGGTGGAGTCAGCACTGGACATCAAATAAGAGAAATCTCAAG |
| <i>L. japonicus</i>     | GTGTCCAGTAGTGGTTTATGGTGGAGCCAGCACTGGACACCAAATAAGGGAAATCTCAAG |
| <i>T. orientalis</i>    | CGGTCCAGTGTTGGTTTATGGTGGAGTCAGCACTGGACACCAAATAAGAGAAATCGAAAG |
| <i>T. maccoyii</i>      | CGGTCCAGTGGTGGTTTATGGTGGAGTCAGCACTGGACACCAAATAAGAGAAATCGAAAG |
| <i>O. goramy</i>        | CGGTCTCTGTAGTTGTTTATGGTGGAGTCAGCACTGCACACCAATCAGAGAAATCTCAAG |
| <i>L. calcarifer</i>    | GCGTCCGGTGGTTGTTTATGGTGGAGTCAGCACTGGATACCAAATAAGGGAAATCTCAAG |
| <i>E. fuscoguttatus</i> | GCGTCCAGTCGTGGTGTATGGTGGAGTCAGCACTGGACACCAGATCAGAGAGATCTGCAG |
| <i>C. carpio</i>        | ACGACCTGTTGTGGTTTATGGAGGTATAAATACCGGATATACTATCCGAGAGGTGTTAAA |

|                         |                                                              |
|-------------------------|--------------------------------------------------------------|
| <i>D. labrax</i>        | GGGATGCAATGTGCTGTGTGGAACACCAGGGAGACTGTTGGATGTGATTGGAAGAGGAAA |
| <i>L. japonicus</i>     | GGGATGCAATGTTCTGTGTGGAACACCAGGGAGACTGTTGGATATGATTGGAAGAGGAAA |
| <i>T. orientalis</i>    | GGGATGCAATGTAGTGTGTGGAACACCAGGGAGGCTATTGGATATGATTGGAAGAGGAAA |
| <i>T. maccoyii</i>      | GGGATGCAATGTAGTGTGTGGAACACCAGGGAGGCTATTGGATATGATTGGAAGAGGAAA |
| <i>O. goramy</i>        | GGGATGCAATGTGCTGTGTGGAACACCAGGGAGACTGTTGGATGTGATCGGAAGAGGAAA |
| <i>L. calcarifer</i>    | GGGCTGCAATGTGCTGTGTGGAACACCAGGGAGACTGTTGGATATGATTGGAAGAGGAAA |
| <i>E. fuscoguttatus</i> | GGGCTGCAATGTGGTGTGTGGAACACCAGGGAGGCTGTTGGATGTGATCGGACGAGGAAA |
| <i>C. carpio</i>        | GGGCTGCAATGTATTGTGTGCTACTCCTGGAAGATTGCATGACCTCATTGGTCGTGGAAA |

|                         |                                                              |
|-------------------------|--------------------------------------------------------------|
| <i>D. labrax</i>        | GGTTGGGTTGAGTAAGGTGCGGTACTTTGTGCTGGATGAGGCTGACCGGATGTTGGATAT |
| <i>L. japonicus</i>     | GGTTGGGTTGAGTAAGTTGCGCTACTTTGTGCTGGACGAGGCTGACCGGATGTTGGATAT |
| <i>T. orientalis</i>    | GGTTGGGTTGAGTAAGCTGCGGTACTTGGTGCTAGATGAGGCCGACCGGATGTTGGATAT |
| <i>T. maccoyii</i>      | GGTTGGGTTGAGTAAGCTGCGGTACTTGGTGCTAGATGAGGCCGACCGGATGTTGGATAT |
| <i>O. goramy</i>        | GGTTGGGTTGAGTAAGCTGAGGTACCTGGTGCTAGATGAGGCTGACAGGATGTTGGATAT |
| <i>L. calcarifer</i>    | GGTTGGGCTGCAGAAGCTGCGGTACTTGGTGCTGGATGAGGCTGACCGTATGCTGGACAT |
| <i>E. fuscoguttatus</i> | GATTGGGTTGAGTAAGCTGCGCTACTTGGTGCTGGACGAGGCAGCCGATGCTGGACAT   |
| <i>C. carpio</i>        | GATTGGCCTGAGTAAAGTGCGCTATCTAGTTCTGGATGAAGCAGACAGAATGCTGGACAT |

|                         |                                                             |
|-------------------------|-------------------------------------------------------------|
| <i>D. labrax</i>        | GG-----GTTTGTAGCCTGACATGCGTCGCTTGGTGGGCTCCCCGGAATGCCATCAA   |
| <i>L. japonicus</i>     | GG-----GTTTGTAGCCTGACATGCGCCGCTTGGTGGGCTCCCTTGAATGCCGTCCAA  |
| <i>T. orientalis</i>    | GG-----GATTTGAGCCTGACATGCGCCGCTTGGTGGGCTCACTGGAATGCCATCCAA  |
| <i>T. maccoyii</i>      | GG-----GATTTGAGCCTGACATGCGCCGCTTGGTGGGCTCACTGGAATGCCATCCAA  |
| <i>O. goramy</i>        | GG-----GTTTTGAGCCTGACATGCGACGCCCTCGTGGGCTCTCTGGAATGCCGTCCAA |
| <i>L. calcarifer</i>    | GG-----GCTTCGAGCCTGACATGCGGCGCCTGGTGGGCTCTCTGGAATGCCATCCAA  |
| <i>E. fuscoguttatus</i> | GG-----GCTTTGAACCTGACATGCGCCGCTTGGTGGGCTCCCTTGAATGCCACCCAA  |
| <i>C. carpio</i>        | GGACATGGGCTTCGAGCCAGATATGCGTAAGCTAGTGGGATCTCCGGGCATGCCTTCAA |

|                         |                                                                |
|-------------------------|----------------------------------------------------------------|
| <i>D. labrax</i>        | AGAGAACCGGCAGACGCTGATGTTTCAGTGCCACCTACCCTGAGGACATTTCAGAGGATGGC |
| <i>L. japonicus</i>     | AGAGAACCGTCAGACTCTGATGTTTCAGTGCCACCTACCCTGAGGACATTTCAGAGGATGGC |
| <i>T. orientalis</i>    | AGAGAACCGTCAGACTCTGATGTTTCAGTGCCACATACCCTGAAGACATCCAGAGGATGGC  |
| <i>T. maccoyii</i>      | AGAGAACCGTCAGACTCTGATGTTTCAGTGCCACATACCCTGAAGACATCCAGAGGATGGC  |
| <i>O. goramy</i>        | AGAGAACCGTCAGACTCTGATGTTTCAGTGCCACCTACCCTGAGGACATCCAGAGGATGGC  |
| <i>L. calcarifer</i>    | GGAGGACCGTCAGACTCTGATGTTTCAGTGCCACCTATCCTGAGGACATCCAAAGGATGGC  |
| <i>E. fuscoguttatus</i> | AGAGAGCGCCAGACTCTGATGTTTCAGCGCCACCTACCCCGAGGACATCCAGAGGATGGC   |
| <i>C. carpio</i>        | AGAGGATCGACAAACCCTCATGTTTCAGTGCCACCTACCCTGAAGATATTCAAAGGATGGC  |

|                         |                                                               |
|-------------------------|---------------------------------------------------------------|
| <i>D. labrax</i>        | AGCAGACTTTCTCAAGACCGACTATTTGTTCTTGGCTGTGGGTGTGGTTGGCGGAGCCTG  |
| <i>L. japonicus</i>     | AGCTGACTTCCTCAAGACGGACTATTTATTCTTGGCTGTGGGTGTGGTGGGCGGAGCCTG  |
| <i>T. orientalis</i>    | GGCTGACTTCCTCAAGACAGACTATTTGTTCTTGGCTGTGGGTGTGGTGGGTGGAGCCTG  |
| <i>T. maccoyii</i>      | TGCTGACTTCCTCAAGACAGACTATTTGTTCTTGGCTGTGGGTGTGGTGGGTGGAGCCTG  |
| <i>O. goramy</i>        | GGCTGACTTCCTGAAGACAGACTATTTGTTCTTGGCTGTGGGTGTGGTGGGTGGAGCCTG  |
| <i>L. calcarifer</i>    | GGCAGACTTCCTCAAGACTGACTATTTGTTCTTGGCTGTGGGTGTGGTGGGAGGAGCCTG  |
| <i>E. fuscoguttatus</i> | GCCTGACTTCCTCAAGACTGACTATTTGTTCTTGGCTGTGGGTATTTGTGGGCGGAGCCTG |
| <i>C. carpio</i>        | TGCAGATTTTTTGAAAGTGGACTACATTTTCTTGTCTGTTGGTGTGGTTGGTGGAGCATG  |

|                         |                                                               |
|-------------------------|---------------------------------------------------------------|
| <i>D. labrax</i>        | CAGTGATGTGGAGCAGACATTTGTCCAGGTCACCAAGTTCTCCAAAAGGGAGCAACTCCT  |
| <i>L. japonicus</i>     | CAGTGACGTGGAGCAGACATTTGTCCAAGTCTACTAAGTTCTCCAAGAGGGAGCAGCTCCT |
| <i>T. orientalis</i>    | CAGTGATGTGGAGCAGACATTTATCCAAGTCACAAAGTTCTCCAAGAGAGAGCAGCTCCT  |
| <i>T. maccoyii</i>      | CAGTGATGTGGAGCAGACATTTATCCAAGTCACAAAGTTCTCCAAGAGAGAGCAGCTCCT  |
| <i>O. goramy</i>        | CAGTGATGTGGAGCAGACATTTGTCCAAGTGACCAAATTTCTCCAAGAGGGAGCAGCTCCT |
| <i>L. calcarifer</i>    | CAGCGATGTGGAGCAGACATTTATTGAAGTTACCAAATTTCTCCAAGAGGGAGCAGCTACT |
| <i>E. fuscoguttatus</i> | CAGTGACGTGGAGCAGTCATTTGTGCAAGTCACCAAGTTCTCCAAGAGGGAGCAGCTCCT  |
| <i>C. carpio</i>        | CAGTGATGTGGAGCAAACATATCGTTCAGGTGACCAG---TACCAAGAGAGACCAGCTGCT |

|                        |                                                                           |
|------------------------|---------------------------------------------------------------------------|
| <i>D.labrax</i>        | TGACCTCCTCAAGACAACCTGGAATGGAGCGCACTATGGTGTTTGTGGAGACCAAGAGACA             |
| <i>L.japonicus</i>     | TGACCTCCTCAAGTCAACTGGAATGGAGCGCACCATGGTGTTTGTAGAGACCAAGAGACA              |
| <i>T.orientalis</i>    | TGACCTCCTGAAGACCACTGGAACGGAGCGCACCATGGTGTTTGTAGAGACCAACGACA               |
| <i>T.maccoyii</i>      | TGACCTCCTGAAGACCACTGGAACGGAGCGCACCATGGTGTTTGTGGAGACCAACGACA               |
| <i>O.goramy</i>        | GGATCTCCTGAAGACCACAGGAACGGAGCGCACCATGGTGTTTGTGGAGACCAAGAGACA              |
| <i>L.calcarifer</i>    | TGACCTCCTGAAGACCACAGGAACGGAGCGCACCATGGTGTTTGTGGAAACCAAGAGACA              |
| <i>E.fuscoguttatus</i> | CGACCTCCTCAAGACCACTGGAACGGAGCGCACCATGGTGTTTGTGGAGACCAAGAGACA              |
| <i>C.carpio</i>        | TGAACTGCTCAGATCTACAGGAATGAACGCACAATGGTCTTTGTTGAAACCAAAAGAAG               |
|                        | * * * * *       * * * * *   * * * * *   * * * * *   * * * * *   * * * * * |

|                        |                                                                                 |
|------------------------|---------------------------------------------------------------------------------|
| <i>D.labrax</i>        | AGCTGATTTTCATTGCCACTTACTTGTGCCAGGAAAAGGTTCCCTACCACCAGCATTTCATGG                 |
| <i>L.japonicus</i>     | AGCTGATTTTATTGCCACTTACTTGTGCCAGGAAAAGGTTCCAACTACAAGCATTTCATGG                   |
| <i>T.orientalis</i>    | AGCTGATTTTATTGCCACGTTCTTGTGCCAAGAGAAAAGTTCCAACTACCAGCATTTCACGG                  |
| <i>T.maccoyii</i>      | AGCTGATTTTATTGCCACGTTCTTGTGCCAAGAGAAAAGTTCCAACTACCAGCATTTCACGG                  |
| <i>O.goramy</i>        | AGCTGATTTTATTGCCACATTCTTGTGCCAGGAGAAGGTTCCCAACAACAGCATTTCATGG                   |
| <i>L.calcarifer</i>    | GGCTGATTTTATTGCCACTTTCCTGTGCCAGGAGAAGGTTCCAACCACCAGCATTTCATGG                   |
| <i>E.fuscoguttatus</i> | AGCTGATTTTCATCGCCACTTATTGTGCCAGGAGAAGGTTCCAACTACGAGCATCCACGG                    |
| <i>C.carpio</i>        | TGCTGATTTTCATTGCAACATTTCTCTGTCAAGAGAAGATGTCTACTACAAGCATCCATGG                   |
|                        | ***** * * * * *       * * * * *   * * * * *   * * * * *   * * * * *   * * * * * |

|                        |                                                                       |
|------------------------|-----------------------------------------------------------------------|
| <i>D.labrax</i>        | TGACCGAGAGCAGCGGGAGCGAGAGCAGGCTCTGGCAGACTTCCGCTCTGGCAAAATGTCC         |
| <i>L.japonicus</i>     | TGACCGTGAGCAGCGGGAGCGAGAGCAGGCTCTGGCCGACTTCCGCTCTGGCAAAATGTCC         |
| <i>T.orientalis</i>    | TGACCGAGAGCAGCGGGAGCGAGAGCAGGCTCTGGCAGACTTCCGCTCTGGTAAATGTCC          |
| <i>T.maccoyii</i>      | TGACCGAGAGCAGCGGGAGCGAGAGCAGGCTCTGGCAGACTTCCGCTCTGGTAAATGTCC          |
| <i>O.goramy</i>        | TGACCGTGAGCAGCGGGAGCGCGAGCAGGCTCTGGCAGACTTCCGCTCTGGTAAATGTCC          |
| <i>L.calcarifer</i>    | TGACCGCAGCAGCGTGAGCGAGAGCAGGCCCTGGCAGACTTCCGCTCCGGCAAGTGTCC           |
| <i>E.fuscoguttatus</i> | GGACCGTGAGCAGCGGGAGAGAGAGCAGGCTCTGGCTGACTTCCGCTCCGGCAAAATGTCC         |
| <i>C.carpio</i>        | TGATCGGGAGCAACGAGAGCGAGAGAAGGCTCTCAGTGATTTTCGCACAGGCCAGTGTCC          |
|                        | * * * * *   * * * * *   * * * * *   * * * * *   * * * * *   * * * * * |

|                        |                                                                       |
|------------------------|-----------------------------------------------------------------------|
| <i>D.labrax</i>        | AGTCCTAGTGGCAACCTCTGTGGCTGCCCGTGGTCTGGACATTCCAGATGTACAGCATGT          |
| <i>L.japonicus</i>     | AGTCCTGGTGGCAACCTCGGTAGCTGCCCGTGGTCTGGATATTCCAGATGTACAGCATGT          |
| <i>T.orientalis</i>    | AGTCCTAGTAGCAACCTCTGTAGCTGCCCGCGGTCTGGATATTCCAGATGTACAGCATGT          |
| <i>T.maccoyii</i>      | AGTCCTAGTAGCAACCTCTGTAGCTGCCCGCGGTCTGGATATTCCAGATGTACAGCATGT          |
| <i>O.goramy</i>        | TGTCCTGGTGGCGACGTCTGTAGCTGCCCGCGGTCTGGATATTCCATGTACACATGT             |
| <i>L.calcarifer</i>    | GGTCCTGGTGGCCACCTCTGTCCCGCCCCGTGGCTGGATATTCCAGATGTGCAGCATGT           |
| <i>E.fuscoguttatus</i> | CGTCCTGGTGGCAACTTCTGTCTGCTGCCCGCGGTCTGGATATTCCCGATGTACAGCACGT         |
| <i>C.carpio</i>        | AGTGCTGGTGGCCACGTACGTCTGCTGCCAGAGGCTGGACATTGAGCAGGTCCAGCACGT          |
|                        | * * * * *   * * * * *   * * * * *   * * * * *   * * * * *   * * * * * |

**Tpe-ddx4R2**  
**3' -TYGGVVMGMACHGG**

|                        |                                                                       |
|------------------------|-----------------------------------------------------------------------|
| <i>D.labrax</i>        | GGTGAACCTTTGACCTCCCCAACAAACATTGACGAATATGTCCACCGTATTGGGAGAACTGG        |
| <i>L.japonicus</i>     | GGTGAACCTTTGACCTCCCCAACAAACATTGACGAATATGTCCACCGTATTGGGAAGAACTGG       |
| <i>T.orientalis</i>    | GGTTAACTTTGACCTCCCCAACAAACATTGATGAATATGTCCACCGTATTGGGAGGACTGG         |
| <i>T.maccoyii</i>      | GGTTAACTTTGACCTCCCCAACAAACATTGATGAATATGTCCACCGTATTGGGAGGACTGG         |
| <i>O.goramy</i>        | GGTGAACCTTTGACCTCCCCAGCAACATCGACGAATACGTGCACCGCATTTGGGAGAACTGG        |
| <i>L.calcarifer</i>    | GGTGAACCTTTGACCTCCCCAACAAACATTGATGAATATGTCCACCGTATTGGGAGAAACCGG       |
| <i>E.fuscoguttatus</i> | GGTGAACCTTTGACCTCCCCAACAAACATCGACGAGTACGTCCACCGTATTGGGAGAACTGG        |
| <i>C.carpio</i>        | TGTGAATTTGACCTGCCAGCAGCATCGACGAATACGTCCATCGCATCGGAAGAACCGG            |
|                        | * * * * *   * * * * *   * * * * *   * * * * *   * * * * *   * * * * * |

**HCGMTGYGGDAA-5'**

|                        |                                                                               |
|------------------------|-------------------------------------------------------------------------------|
| <i>D.labrax</i>        | CCGCTGTGGTAACTACTGGAAGGGCGGTGTCTTTCTTTGACCCAGATTCTGATGACCAATT                 |
| <i>L.japonicus</i>     | CCGCTGTGGAAACTACTGGGAGGGCTGTCTTTCTATGACCCAGATGCTGATGGCCAATT                   |
| <i>T.orientalis</i>    | CCGCTGCGGTAAACACAGGGAGGGCAGTGTCTTTCTATGACCCGTGATGCTGATGGCCAAT                 |
| <i>T.maccoyii</i>      | CCGCTGCGGTAAACACAGGGAGGGCAGTGTCTTTCTATGACCCGTGATGCTGATGGCCAAT                 |
| <i>O.goramy</i>        | CCGCTGTGGGAACTACTGGGAGGGCGGTGTCTTTCTATGACCCAGAAGCTGATGGCCATTT                 |
| <i>L.calcarifer</i>    | CCGCTGCGGTAAACGTGCGGAGGGCGGTGTCTTTCTACGACCCAGACGCTGACGTCAGCT                  |
| <i>E.fuscoguttatus</i> | CCGCTGTGGGAACTACTGGGAGGGCGGTGTCTTTCTACGACCCAGATAATGATAACCAAGTT                |
| <i>C.carpio</i>        | ACGCTGTGGGAAACATCGGGCGGGCCGTGTCTTTTAAACCCAGAGTCTGACACTCCATT                   |
|                        | ***** * * * *       * * * * *   * * * * *   * * * * *   * * * * *   * * * * * |

# Tpe-ddx4R1

3' -CCYCARCAGGARGTKCCBWMVTGG-5

|                        |                                                              |
|------------------------|--------------------------------------------------------------|
| <i>D.labrax</i>        | GGCTCGCTCCCTAGTCACAATCCTGTCCAAGGCTCAGCAGGAAGTGCCTTCATGGTTGGA |
| <i>L.japonicus</i>     | GGCTCGCTCCCTGGTCACAGTCCTGTCCAAGGCCAGCAGGAAGTGCCTTCATGGTTAGA  |
| <i>T.orientalis</i>    | GGCTCGCTCCCTGGTCACAGTCCTGTCCAAGGCCAGCAGGAAGTGCCTTCATGGTTAGA  |
| <i>T.maccoyii</i>      | GGCTCGCTCCCTGGTCACAGTCCTGTCCAAGGCCAGCAGGAAGTGCCTTCATGGTTAGA  |
| <i>O.goramy</i>        | GGCTCGTTCCTTGGTCGGTGTCTGTCCAAGGCCAGCAGGAGGTGCCTTCATGGTTAGA   |
| <i>L.calcarifer</i>    | GGCTCGATCCTTGGTCACAGTCCTGTCCAAGGCTCAGCAGGTAGTGCCTTCATGGTTAGA |
| <i>E.fuscoguttatus</i> | GGCCCGCTCTCTGGTCACGATCCTGTCCAAGGCTCAACAGGAAGTGCCTCGCTGGTTAGA |
| <i>C.carpio</i>        | AGCTCGCTCTCTGGTCAAAGTTCTGTCTGGGCCCCAACAGGAAGTTCCCAATGGCTGGA  |
|                        | ** ** * * ** * ** * ** * ** * ** * ** * **                   |

|                        |                                                               |
|------------------------|---------------------------------------------------------------|
| <i>D.labrax</i>        | GGATTCTGCATTCACTGGCCCC---TGGTAGCATGGGCGTCG---CCCCCAGAAAGACATT |
| <i>L.japonicus</i>     | GGAGTTTGCCTTCAGCGGCC---TGCAACCACAGGCTTCAATCCTCCAGGAAGAACTT    |
| <i>T.orientalis</i>    | AGAGTCTGCGTTCAGCGGACC---TGCTACCACTGGCTTTAACCCACCTAGGAAGAACTT  |
| <i>T.maccoyii</i>      | AGAGTCTGCGTTCAGCGGACC---TGCTACCACTGGCTTTAACCCACCTAGGAAGAACTT  |
| <i>O.goramy</i>        | GGAGGCTGCGTTCAGTGGCCCC---CAGTTCCACAGGCTTCAACCCACCCAGGAAGAACTT |
| <i>L.calcarifer</i>    | GGAGCACGCATTCTCTGGCCT---CAGT---ACAGGCTTCAACCCCCCAGGAAGAACTT   |
| <i>E.fuscoguttatus</i> | GGAGTCGGCGTTCAGCGGCGGGGCGGAGGCTCAGGCTTCAACGCCCCCAGGAAAGCTT    |
| <i>C.carpio</i>        | GGAAATTGCTTTCAGTGCTCA---TGGAACAACAGGTTTTTAACCCCTCGTGGAAGTGT   |
|                        | **   ** *** *                   ** *       * *   * ** **      |

|                        |                                                                |
|------------------------|----------------------------------------------------------------|
| <i>D.labrax</i>        | TGCCTCCTCAGACTCCAGAAAGGGCCCCACAGGGAGGATCTGTCCAAGAC-----GACAGC  |
| <i>L.japonicus</i>     | TGCCTCCTCAGACTCCAGGAAGGG-----AGGATCTTTCCAAGAC-----AATGGT       |
| <i>T.orientalis</i>    | TGCCTCCACAGACTCCAGGAAGAG-----AGGATCTTTCCAAGAC-----AACAGT       |
| <i>T.maccoyii</i>      | TGCCTCCACAGACTCCAGGAAGAG-----AGGATCTTTCCAAGAC-----AACAGT       |
| <i>O.goramy</i>        | TGCCTCCACAGACACCAGACAGAG-----AGGATTGTTGCAAGAC-----ACCAGT       |
| <i>L.calcarifer</i>    | TGCCTCCACAGACTCCAGGAAGGG-----AGGATCCTTTCCAGGAC-----AACATG      |
| <i>E.fuscoguttatus</i> | TGCCTCCACAGACTCCAGGAAGGG-----AGGATCTTCCAGGAC-----AACAGT        |
| <i>C.carpio</i>        | TGCGTCTACAGACACCCGGAAGGG-----AGGGTCCTT-CAAGACGGATGAGCCGC       |
|                        | *** **   ***** ** *   * *                   *** *       ** *** |

|                        |                                                                     |
|------------------------|---------------------------------------------------------------------|
| <i>D.labrax</i>        | GTGCAGAGCCAGTCGGCTGCTCAGACTGCAC---ATGATGAAGAAGAATGGGAT <b>TAG</b>   |
| <i>L.japonicus</i>     | ATGGAGAGCTTGCCGGCTGCTCAGGCTGCAG---CTGATGATGAAGAATGGGAG <b>TAG</b>   |
| <i>T.orientalis</i>    | GTGAAGAGCCAGCCGGCTGTTTCACTGCAGCGGATGATGATGAGGAATGGGA <b>TAG</b>     |
| <i>T.maccoyii</i>      | GTGAAGAGCCAGCCGGCTGTTTCACTGCAGCTGATGATGATGAGGAATGGGA <b>TAG</b>     |
| <i>O.goramy</i>        | GTGATGAGCCAGCCGGCTGCTCAGCCTGCAG---CTGATGAAGAAGAGTGGGAG <b>TAG</b>   |
| <i>L.calcarifer</i>    | ATGAAGAGCCAGCCGGCTGCTTGGCTGCAG---CTGACGAGGAAGAATGGGA <b>TAG</b>     |
| <i>E.fuscoguttatus</i> | GTGAAGAGTCTCCAGCTGCTCAGTCAGCTA---ACGATGATGAAGAGTGGGA <b>TAG</b>     |
| <i>C.carpio</i>        | CTCAAGCATCCGCCCCAAGCCAG-CAGCTGCTGCAGATGATGAAGAATGGGA <b>TAA</b>     |
|                        | *   *               *   * * * *                   ** ** * ** * ** * |



**S2A.**Multiple alignment of amino acid of the known piscine Dnd protein homologs and location of degenerate primer design. *M. anguillicaudatus*, BAJ19134.1; *D. rerio*, NP\_997960.1; *C. gibelio*, AKL72310.1; *G. rarus*, AIF74583.1; *O. mykiss*, NP\_001118133.1; *S. salar*, NP\_001266060.1; *O. latipes*, NP\_001157988.1; *O. mossambicus*, ALM89050.1; *P. olivaceus*, AKD44207.1

### Tpe-dndF1

```

M.anguillicaudatus -----MEGADLLQLFNPQALKALKEWMQKSSTTLTQVNGQRKYGGP 41
D.rerio -----MVGDMDAQQQLQQLNPQKLKSLQEWQMQRNSITLTQVNGQRKYGGP 47
C.gibelio -----MEGQQLQQLNPQRLKSLQEWQMKSITLTQVNGQRKYGGP 41
G.rarus -----MDG-QQQQVLNPQRLKSLKEWQKSSITLTQVNGQRKYGGP 40
O.mykiss -----MEERSQVLNPERLKALEMWLQETDVKLTQVNGQRKYGGP 40
S.salar -----MEERSQVLNPERLKALEMWLQETDVKLTQVNGQRKYGGP 40
O.latipes -----MDNQSKVNLERVQALQAWVKSTNTKLTQVNGQRKYGGP 39
O.mossambicus -----MENTQSQVLNLERVQALEIWLKATNTKLTQVNGQRKYGGP 40
P.olivaceus MQPRGDREASQNPAMEEE-VMEEAQSVLNFEPVPALETWLKTTNTQLIQVNGQRKYGGP 59
::.* : : :.* :.*: .. * *****

```

### Tpe-dndR1

```

M.anguillicaudatus PPGWHGPAPGPGCEVFISHIPRNVFEDTLIPLFQRVGTLYEFRLMMNFSGQNRGFAYAKY 101
D.rerio PPGWQGPAPGSGCEVFISQIPNDVYEDRLIPLFQSIGTIYEFRLMMNFSGQTRGFAYAKY 107
C.gibelio PPGWRGPVPGPGCEVFISQIPRDVYEDRLIPLFQSIGTIYEFRLMMNFSGQNRGFAYAKY 101
G.rarus PPGWQGPAPGPGCEVFISQIPRDVYEDRLIPLFQSVGTLYEFRLMMNFSGQNRGFAYAKY 100
O.mykiss PDDWLGAAPPGPGCEVFISQIPRDVFEDQLIPLFRAVGPLWEFRLMMNFSGQNRGFAYAKY 100
S.salar PDDWLGAAPPGPGCEVFISQIPRDVFEDQLIPLFRAVGPLWEFRLMMNFSGQNRGFAYAKY 100
O.latipes PDVWDGPPPGARCEVFISQIPRDVYEDLLIPLFSSVGALWEFRLMMNFSGQNRGFAYAKY 99
O.mossambicus PEVWEGPTPGPRCEVFISQIPRDAYEDILIPLFSSIGPLWEFRLMMNFSGQNRGFAYAKY 100
P.olivaceus PEVWNGPIPGAHCCEVFISQIPRDAYEDLLIPLFSSVGPLWEFRLMMNFSGQNRGFAYAKY 119
* * * * * *****.*.:.* ***** :* :.*:*****.*.*****

```

```

M.anguillicaudatus GDQVTAITAVKTLNQHRIADGVRLMVRRSMEKRQLWIE---DLPPDVSQDELLMMLRQIS 158
D.rerio GDPLTASAAVTTLHQYRLPEGGLTVRRSTEKRLRLG---DLPVSMNESKLLMVLQMLS 164
C.gibelio GDPLTASTAVTLHGHYRLPEGGLTVRRSTEKRLRLG---DLPTSINQVELLRMLRMS 158
G.rarus GDPFTASTAVMTLHQYPLQEGVCLTVRRSTEKRLRLG---DLPTNVNQTEMLMVLQMS 157
O.mykiss DSPASAAAIRSLHGRALESGARLSVRRSTEKRLCLG---ELPTSTRREQLLQVLLDFS 157
S.salar DSPASAAAIRSLHGRALESGARLGVRSTEKRLCLG---ELPTSTRREQLLQVLLDFS 157
O.latipes GTAAIANDAIHLLHGYPLGPGARLSVRCSEKRQLCIQ---NLPASTRQEELLQVLRLLS 156
O.mossambicus GSAAIAVEAIRQLHGHMVEPGYRISVRRSTEKRLHCIGGIGGLPASTRQEGILQVLRMLV 160
P.olivaceus SSSGLAAEAICLLDGYMVEQGSCIKVRLSIEKRHLICIE---DLPATTRQEELLEVLRLVLT 176
. * *: *. : * : * * *.*: * : ** . :* :* :

```

```

M.anguillicaudatus EGVEDVTLKFSGPKGGDVAHVSYFTHIAASMANKVLVEAFKKQYGMSTVVRWMTFTAKS 218
D.rerio DGVEDVLLKPPGPKGKEVALVNYTSHYAASMAKKVLVEAFNRNRYGISITVRWTSFS-KS 223
C.gibelio EGVEEVLLKMAGPKGREFVALVNYSSHYAASMAKKVLVQAFKQYGISITVKWMSFS-KS 217
G.rarus EGVENVLLKLAGPKGREVALVNYSSHYAASMAKKVLVEAFKKQCGISITVSWTSFS-KS 216
O.mykiss EGVEGVSLR-AGPREQGLSAVVVYASHHAASMAKKVLIEAFKKRFGLAITLKWQSSSRPK 216
S.salar EGVEGVSLR-AGPGEQGMSAVVVYASHHAASMAKKVLIEAFKKRFGLAITLKWQSSSRPK 216
O.latipes AGVESVALK-AGPGIEGSAVVAFFSSHHAASMAKKALGEEFKQFCLDISIKWLSAEKPN 215
O.mossambicus EGVERVSLK-AGPGIEGVSATVAFSSHHAASMAKKVLVEAFKKQFTMCVSVKWPTEKPN 219
P.olivaceus EGVQKVSILT-AGPGIEGSAIVAFLSHYTASMAKKMLVEVFKQFALNISIVWHPDESLS 235
**:* * * * . * * : * :.*:* * : *.: : : * .

```

```

M.anguillicaudatus KHVEKTKQDNGPPAPPSPKPLSKPF---SHLHTQPS-----HHIIPHTHTTPQPFTRAVGA 270
D.rerio KRVEDTPQEDSCVTPLVLKPLSKPS-----LL-----HYDVPAPHQSLPLFRAVGG 269
C.gibelio KHVDETGED-DRFTPPVLNPLPKPSITPPHLHPQPL-----LHDVPPHPLIQPFRAAGG 271
G.rarus KRVKEMGQEDDFTTTPGLKPLTKPSLSPCLYPQLS-----HHDVPAHPTLQPFRAVGG 271
O.mykiss HEPPRPS-----KTPPS-----PKPP--HCSLLDSPRPPL-----RLAQRQLPAFSRAVRA 261
S.salar HEPPRPS-----KTPPSP--PKPP--RCSLLDSPRPPL-----HLAQRQLPAFSRAVRA 263
O.latipes PDKPPP-Q---RAPKGLLPSPLKH--L---GQTSRPLPRL--ASPAVPTAFCKAVGG 262
O.mossambicus PDEPRCPQ---KRAKSLPLSHLGP--L--HHSSPQPSGPPSFLTLPASIPAGFCRAVGG 271
P.olivaceus PNKPPKS-----PLASPLKP--PCHILKSPQPSVPPHLAHHSPTPPSFCRAVGG 283
: :*. .

```

|                            |                                                               |     |
|----------------------------|---------------------------------------------------------------|-----|
| <i>M. anguillicaudatus</i> | PVTQPRNEP-----ISQSRDAASQL                                     | 290 |
| <i>D. rerio</i>            | PTTSEQRDEMIPQPTIMSRNELIPQSSIRQRDEMVPQLPIRPRDGMAPQSPISLDAVSHL  | 329 |
| <i>C. gibelio</i>          | PAGLRDETM-----PRAPVNQDAVSQ                                    | 293 |
| <i>G. rarus</i>            | PTAPPRDEMMA-----NPNPNVRDTSVQL                                 | 296 |
| <i>O. mykiss</i>           | PPPMVHAA-----PESLREV-----TVVPEVDAAALL                         | 288 |
| <i>S. salar</i>            | PSPMVHAA-----PESPRGA-----TMVPPVDAAALL                         | 290 |
| <i>O. latipes</i>          | PPTQHDTHVKGT--SPPPRG-----QVMFSVSPVLLL                         | 292 |
| <i>O. mossambicus</i>      | PTAPQLSHPTCSFPDSSTQG-----HLVFAASPVMFL                         | 303 |
| <i>P. olivaceus</i>        | PTAFSHPHCPHHFTFSSSQG-----DRVPESPVMLL                          | 315 |
|                            | * . . *                                                       |     |
| <i>M. anguillicaudatus</i> | KWLCEVNKLGTPRYEARYNHIGPDGFL-YFTYKVMIPALSFPLYGQSVQILPGTSARAMKG | 349 |
| <i>D. rerio</i>            | QWMCEVNRLGSPQYEVHFHHAAPDGFL-YFAFKVLIPGLPLPLYGFVQILPGTSARAMKS  | 388 |
| <i>C. gibelio</i>          | QWICELHRLGTPQYEVRFHRTSSDGFL-YFNFKVLVPGLLPLFNGVIQILPGTSIQAMKA  | 352 |
| <i>G. rarus</i>            | QSMCEANRLGAPQYEVRYHHTGPDGLSSTFAFKVLIPGLLLPLFGAVQILPGTSAQAMKG  | 356 |
| <i>O. mykiss</i>           | QGVCEVYQGKPLYDLQYRHMGPDGFL-CFSYRVYVPGLATPFTGMVQTLPGPTPGAIQE   | 347 |
| <i>S. salar</i>            | QGVCEVYQGKPLYDLQYRHMGPDGFL-CFSYRVYVPGLATPFTGMVQTLPGPTPGAIQE   | 349 |
| <i>O. latipes</i>          | RKLSEASGWGDPHYEMLFHSHAGPDGFL-YFTYKVHVPGAPTFRGFVMILPGHCTSTMLE  | 351 |
| <i>O. mossambicus</i>      | SKLCETAGVGQPFYEVQYSHAGPDGFL-YFSYKVQIRGITAAFKGLVMILPGPNVSTMLE  | 362 |
| <i>P. olivaceus</i>        | SKVCEVTGVGQPRYEMSYSHTGRNGFL-YFDYTVCIPIRITPFFKGLVMTLPGPTASTVQE | 374 |
|                            | : . * * * * : : . : * : * : : * : * * : :                     |     |
| <i>M. anguillicaudatus</i> | EVHRATAEQVIQTIYTAARWQPF-----                                  | 372 |
| <i>D. rerio</i>            | EVYRAAAEQVIQTLCRVSNLRPF-----                                  | 411 |
| <i>C. gibelio</i>          | EVYRAAAEQVIQTMCKVSNLRPF-----                                  | 375 |
| <i>G. rarus</i>            | EVCRAAAEQVIQTMCKGLKFATFLKFELFLLM                              | 388 |
| <i>O. mykiss</i>           | EARRATAQQVLSALYRA-----                                        | 364 |
| <i>S. salar</i>            | EARRATAQQVLSALYRA-----                                        | 366 |
| <i>O. latipes</i>          | EARRAAAQQVLQKLCSSGLSA-----                                    | 372 |
| <i>O. mossambicus</i>      | EAQKAVAQQVLQKMYNTGLTH-----                                    | 383 |
| <i>P. olivaceus</i>        | EAGQAAAQQVLKRIYNNQ-----                                       | 392 |
|                            | * . : * . * : * : . :                                         |     |

**S2B.** Nucleotide alignment of the known piscine deadend homologs and degenerate oligonucleotide primer design for cloning of *dnd1*. *M. anguillicaudatus*, BAJ19134.1; *D. rerio*, NP\_997960.1; *C. gibelio*, AKL72310.1; *G. rarus*, AIF74583.1; *O. mykiss*, NP\_001118133.1; *S. salar*, NP\_001266060.1; *O. latipes*, NP\_001157988.1; *O. mossambicus*, ALM89050.1; *P. olivaceus*, AKD44207.1

```

O.mykiss      -----ATG
S.salar       -----ATG
C.gibelio     -----ATGGAG
D.rerio       -----ATGGTCGGAGACATGGATGCCCAG
G.rarus       -----ATGGAT
M.anguillicaudatus -----ATGGAA
O.latipes     -----
P.olivaceus   ATGCAGCCGCGGGGCGACAGAGAGGCGTCACAGAACCCAGCGATGGAGGAGGAGGTGATG
O.mossambicus -----ATG

```

```

O.mykiss      GAGGAGCGTTCAAGTCAGGTGTTGAACCCGAGCGACTGAAGGCGCTGGAGATGTGGCTG
S.salar       GAGGAGCGTTCAAGTCAGGTGTTGAACCCGAGCGACTGAAGGCGCTGGAGATGTGGCTG
C.gibelio     GGACAGCAGCTACAGCAGCTTTTGAACCCGAGAGACTGAAGTCACTTCAAGAATGGATG
D.rerio       CAGCAGGAGCTTCAGCAGATTCTGAACCCGAGAACTCAAGTCTCTGCAGGAATGGATG
G.rarus       GGACAGCAGC---AGCAGGTTTGAACCCGAGAGACTGAAGTCACTAAAAGAATGGGTG
M.anguillicaudatus GGAGCAGATCTGCTACAGCTTTTCAACCCGAGGCACTGAAGGCACTGAAGGAGTGGATG
O.latipes     ATGGACAATCAGAGCAAGGTGGTGAACCTTGAGCGGGTCCAGGCACTTCAGGCCCTGGGTC
P.olivaceus   GAGGCCGCGCAGAGCCAGGTCTGAACTTTGAGCCGGTGCCAGCGCTGGAAACCTGGCTG
O.mossambicus GAAAACACGCAAAGCCAGGTGCTGAACCTTGAACGGGTGCAGGCCCTGGAAATCTGGTTG
                ** * * ** * * * *

```

### Tpe-dndF1

5' -**AA**YGGNCARMGNAARTAYGG-3'

```

O.mykiss      CAGGAGACTGACGTCAAACCTGACCCAAAGTCAATGGCCAGAGAAAATATGGAGGTCCACCT
S.salar       CAGGAGACTGACGTCAAACCTGACCCAGGTCAATGGCCAGAGGAAATATGGAGGTCCACCT
C.gibelio     CAGAAAAGCTCAATCACTTTAACACAGGTCAATGGGCAGAGGAAATATGGTGGTCCCTCCT
D.rerio       CAGAGGAACTCCATCACTTTAACCCAAAGTCAATGGGCAGAGGAAATATGGTGGTCCCTCCT
G.rarus       CAGAAAAGCTCCATCACTTTAACACAGGTCAACGGGCAGAGGAAATATGGTGGTCCCTCCT
M.anguillicaudatus CAAAAATCCTCCACCACCTTAACGCAGGTCAACGGTCAGAGGAAATATGGTGGTCCCTCCT
O.latipes     AAGTCCACCAATACCAAACCTGACCCAGGTTAACGGCCAGAGGAAGTATGGAGGGCCACCT
P.olivaceus   AAAACAACCAATACACAACCTGATTCAAGTAAATGGCCAGAGGAAGTATGGAGGACCACCT
O.mossambicus AAAGCAACCAACACAAAGCTGACTCAAGTTAATGGCCAGAGGAAATATGGAGGACCACCT
                * * * * *

```

```

O.mykiss      GATGATTGGCTTGGCGCCCCCCTGGGCGGGCTGTGAGGTGTTTCATCAGCCAGATCCCG
S.salar       GATGACTGGCTTGGCGCCCCCCTGGGCGGGCTGTGAGGTGTTTCATCAGCCAGATCCCG
C.gibelio     CCGGGCTGGCGAGGTCTGTTCGGGGCGGGCTGTGAGGTGTTTCATCAGTCAGATCCCG
D.rerio       CCAGGTGGCAGGGTCTGCTCCTGGTTCGGGCTGTGAGGTGTTTCATCAGTCAGATCCCG
G.rarus       CCGGGCTGGCAAGGTCTGCTCCCGGCCAGGCTGTGAGGTGTTTCATCAGTCAGATCCCA
M.anguillicaudatus CCGGGCTGGCACGGTCTGCTCCAGGGCCAGGTTGCGAGGTCTTTATCAGTCATATTCCA
O.latipes     GATGTGTGGGACGGTCCCCACCTGGGGCGCGCTGTGAGGTCTTTATCAGCCAGATCCCA
P.olivaceus   GAGGTGTGGAACGGCCCCATCCCAGGAGCCACTGCGAGGTCTTCATCAGCCAGATCCCA
O.mossambicus GAGGTGTGGGAAGTCCACACCGGACCGCGCTGTGAAGTCTTCATCAGCCAGATCCCA
                * ** * * * *

```

```

O.mykiss      CGGGATGTCTTTGAGGACCAGCTGATTCCGCTGTTCCGTGCGGTGGGCCCTCTCTGGGAG
S.salar       CGGGATGTCTTTGAGGACCAGCTGATTCCGCTGTTCCGTGCGGTGGGCCCTCTCTGGGAG
C.gibelio     CGCGACGTCTACGAGGACCGCTGATCCCTCTTTTCCAGAGCATTGGCACTATTTACGAG
D.rerio       AACGACGTGTACGAGGACCGCTGATCCCTCTCTTCCAGAGCAGCGGCACCATTTACGAG
G.rarus       CGTGATGTCTACGAGGACCGATTGATTCTCTCTTCCAGAGCGTCGGTACACTTTATGAG
M.anguillicaudatus CGTAACGTCTTTGAGGACACCTAATCCCGCTCTTCCAGAGAGTCGGCACTCTATACGAG
O.latipes     CGGGATGTCTACGAGGACCTGCTCATCCCCCTCTTCAGCTCGGTGGGGGCACTTTGGGAA
P.olivaceus   CGGGACGCTACGAGGACCTGCTGATCCCCCTGTTTCAGCTCTGTGGGGCCTCTCTGGGAG
O.mossambicus CGGGACGCTACGAGGACCTGCTTATCCCTGTTTCAGCTCCATTGGGCCACTCTGGGAG
                * * * * *

```

## Tpe-dndR1

3' -ATGATGAAYTTYWSNGGNCA-5'

|                           |                                                                |
|---------------------------|----------------------------------------------------------------|
| <i>O.mykiss</i>           | TTCCGCCTCATGATGAACCTTCAGCGGACAGAACCCTGGCTTTGCCTACGCCAAGTACGAC  |
| <i>S.salar</i>            | TTCCGCCTCATGATGAACCTTCAGCGGACAGAACCCTGGCTTTGCCTACGCCAAGTACGAC  |
| <i>C.gibelio</i>          | TTTCGTCTCATGATGAACCTTCAGCGGGCAGAACCAGAGGCTTCGCCTACGCCAAGTACGGC |
| <i>D.rerio</i>            | TTTCGCCTCATGATGAACCTTCAGCGGGCAGACCCGGGGCTTCGCCTATGCTAAGTACGGT  |
| <i>G.rarus</i>            | TTTCGTCTCATGATGAATTTTCAGCGGACAGAACCAGAGGCTTTGCCTATGCAAAGTACGGC |
| <i>M.anguillicaudatus</i> | TTTCGTCTCATGATGAACCTTCAGTGGGCAGAACCAGGGCTTCGCCTACGCTAAGTACGGT  |
| <i>O.latipes</i>          | TTCCGGCTCATGATGAACCTTCAGCGGTCAGAACCAGGGGCTTCGCCTACGCCAAATACGGC |
| <i>P.olivaceus</i>        | TTTAGGCTCATGATGAACCTTCAGCGGGCAGAACCCTGGCTTTGCATATGCTAAATACAGC  |
| <i>O.mossambicus</i>      | TTCCGGCTCATGATGAACCTTCAGTGGGCAGAACCAGGGCTTTGCGTATGCCAAATATGGC  |

\*\* \* \* \* \* \* \* \* \* \* \* \* \* \* \* \* \* \* \* \* \* \* \* \* \* \* \* \* \* \* \*

|                           |                                                               |
|---------------------------|---------------------------------------------------------------|
| <i>O.mykiss</i>           | AGCCCTGCCTCGGCCGCTGCCGCCATCCGCTCGTTGCATGGCCGTGCCCTGGAGTCAGGG  |
| <i>S.salar</i>            | AGCCCTGCCTCGGCCGCTGCCGCCATCCGCTCGTTGCATGGCCGTGCCCTCGAGTCAGGG  |
| <i>C.gibelio</i>          | GACCCCTCACCGCCTCCACCGCCGCTTTGACCCTGCATCACTACCGTCTGCCGGAGGGG   |
| <i>D.rerio</i>            | GACCCCTTACAGCCTCGGCTGCCGTCACCACGCTGCATCAGTACCGGCTGCCGGAGGGG   |
| <i>G.rarus</i>            | GACCCCTTACCGCATCCACCGGCTCATGACCCTCCATCAGTATCCTCTGCAGGAGGGG    |
| <i>M.anguillicaudatus</i> | GACCAGGTCACGGCCATAACTGCCGTTAAGACCCTCAATCAGCACCAGGATTGCGGATGGG |
| <i>O.latipes</i>          | ACGGCCGCCATCGCCAATGATGCCATCCACCTCCTTCACGGCTACCCGCTGGGGCCTGGG  |
| <i>P.olivaceus</i>        | TCCTCGGGTTTGGCTGCTGAAGCAATCTGCCTGCTCGATGGCTACATGGTGGAGCAAGGC  |
| <i>O.mossambicus</i>      | TCAGCTGCTATAGCTGTTGAAGCCATACGACAGCTGCACGGTCACATGGTGGAGCCTGGC  |

\* \* \* \* \* \* \* \* \* \* \* \* \* \* \* \* \* \* \* \* \* \* \* \* \* \* \* \* \* \*

|                           |                                                               |
|---------------------------|---------------------------------------------------------------|
| <i>O.mykiss</i>           | GCACGCCTCAGTGTACGGCGCAGCACAGAGAAACGTCAGCTCTGTCTTGGGGAG-----   |
| <i>S.salar</i>            | GCACGCCTCGGTGTACGGCGCAGCACGGAGAAACGTCAGCTCTGTCTTGGGGAG-----   |
| <i>C.gibelio</i>          | GGCTGCCTGACAGTGCAGAACAGCACAGAGAACGGCAGCTGCGTCTGGGGGAT-----    |
| <i>D.rerio</i>            | GGCTGCCTGACCGTGCAGCAGGAGCACCGAGAAAGCGCCAGCTGCGTTTGGGGGAT----- |
| <i>G.rarus</i>            | GTTTGTCTGACGGTTTCGACAGGAGCACGGAGAAGCGCCAGCTGCGCCTGGGGGAT----- |
| <i>M.anguillicaudatus</i> | GTTTCGATTGATGGTGCAGGAGCATGGAGAAGAGGCAGCTGTGGATTGAGGAC-----    |
| <i>O.latipes</i>          | GCTCGCCTCAGCGTGCGCTGTAGTCATCGAGAAGCGCCAGCTCTGCATCCAGAAC-----  |
| <i>P.olivaceus</i>        | TCCTGCATCAAGGTCCGCTGAGTATAGAGAAGAGACACCTCTGCATTGAGGAT-----    |
| <i>O.mossambicus</i>      | TACCGCATCAGTGTACGGCGGAGCACAGAGAAGCGACACCTTTGTATTGGAGGTATTGGA  |

\* \* \* \* \* \* \* \* \* \* \* \* \* \* \* \* \* \* \* \* \* \* \* \* \* \* \* \* \* \*

|                           |                                                               |
|---------------------------|---------------------------------------------------------------|
| <i>O.mykiss</i>           | ---CTGCCCACCAGCACAAAGGAGGGAGCAACTGCTGCAGGTGCTGCTGGACTTCTCTGAG |
| <i>S.salar</i>            | ---CTGCCCACCAGCACAAAGGAGGGAGCAACTGCTGCAGGTGCTGCTGGACTTCTCTGAG |
| <i>C.gibelio</i>          | ---CTTCCGACTAGCATAAATCAGGTGGAGTTGCTGAGGATGCTGCGAATGATGCTGAA   |
| <i>D.rerio</i>            | ---CTGCCCCTCAGCATGAATGAATCGAAGCTGCTGATGGTGTCTCCAGATGCTCTCTGAC |
| <i>G.rarus</i>            | ---CTTCCGACTAACGTGAATCAGACGGAGATGCTGATGGTGTCTCCAAATGATGTCTGAG |
| <i>M.anguillicaudatus</i> | ---CTGCCACCCGACGTGAGCCAGGATGAAGTCTGCTGATGCTTCGACAGATTTTCGGAG  |
| <i>O.latipes</i>          | ---CTGCCAGCTTCCACCAGGCAGGAGGAGCTGCTGCAGGTGCTGCGTTTGTGTCTGCG   |
| <i>P.olivaceus</i>        | ---CTGCCGGCCACCACAGGCAAGAGGAGCTGCTGGAGGTTCTGCGTGTGCTGACTGAG   |
| <i>O.mossambicus</i>      | GGTCTGCCTGCTTCCATGACACAAGAAGGCATACTGCAGGTGCTGCGTATGCTGGTAGAG  |

\* \* \* \* \* \* \* \* \* \* \* \* \* \* \* \* \* \* \* \* \* \* \* \* \* \* \* \* \* \*

|                           |                                                              |
|---------------------------|--------------------------------------------------------------|
| <i>O.mykiss</i>           | GGGGTAGAGGGCGTGTCCCTGAG---AGCAGGGCCTCGGGAACAGGGGCTGTCTGCAGTG |
| <i>S.salar</i>            | GGGGTAGAGGGCGTGTCCCTGAG---AGCAGGGCCTCGGGAACAGGGGATGTCTGCAGTG |
| <i>C.gibelio</i>          | GGGGTAGAGGAGGTCTGTGAAGATGGCCGGGCCCAAAGGGAGAGAGTTTGTGGCCCTA   |
| <i>D.rerio</i>            | GGTGTAGAGGACGTCTGCTGAAGCCACCGGGGCCCAAAGGGAAAGAGGTTGTGGCTCTA  |
| <i>G.rarus</i>            | GGTGTGGAGAATGTCTGCTGAAGTTGGCCGGGCCCAAAGGGAGAGAGGCTGTGGCTCTA  |
| <i>M.anguillicaudatus</i> | GGCGTGGAGGATGTACGCTGAAGTTTAGCGGGCCTAAAGGGGGAGATGTGCGCGCTGTA  |
| <i>O.latipes</i>          | GGTGTGGAGAGTGTGCGCTTGAA---GGCTGGCCCTGGCATAGAGGGGTGTGAGCCGTT  |
| <i>P.olivaceus</i>        | GGCGTGCAGAAAGTGTCTCTGAC---AGCCGGGCCTGGTATCGAGGGGTGTGCGCCATA  |
| <i>O.mossambicus</i>      | GGGGTAGAGAGAGTTTCCCTGAA---GGCCGGACCTGGTATAGAGGGGTATCTGCTACT  |

\* \* \* \* \* \* \* \* \* \* \* \* \* \* \* \* \* \* \* \* \* \* \* \* \* \* \* \* \* \*

|                           |                                                              |
|---------------------------|--------------------------------------------------------------|
| <i>O.mykiss</i>           | GTGGTCTATGCCTCCCACCATGCAGCTTCCATGGCCAAGAAGGTGCTGATTGAAGCCTTT |
| <i>S.salar</i>            | GTGGTCTATGCCTCCCACCATGCAGCTTCCATGGCCAAGAAGGTGCTGATTGAAGCCTTT |
| <i>C.gibelio</i>          | GTGAATACTCTCTCCACTACGCCGATCCATGGCCAAGAAAGTGTCTGTGCAAGCTTTT   |
| <i>D.rerio</i>            | GTCAACTACAGCTCCCATACGCCGATCCATGGCTAAGAAAGTGTCTGTTGAAGCTTTT   |
| <i>G.rarus</i>            | GTGAATACTCTCTCCACTACGCCGCGTCCATGGCCAAGAAAGTGTCTGTGGAAGCTTTT  |
| <i>M.anguillicaudatus</i> | GTCAGCTACTTCACGCATATCGCTGCATCTATGGCTAACAAAGTATTGGTCGAAGCATTC |
| <i>O.latipes</i>          | GTGCTTTTCTCTCTCATCATGCAGCCTCCATGGCCAAGAAGGCTCTGGGAGAAGAGTTT  |
| <i>P.olivaceus</i>        | GTAGCCTTCTTGTCCACTACACTGCTTCTATGGCCAAGAAGATGCTGGTTGAAGTGTTT  |
| <i>O.mossambicus</i>      | GTTGCTTTTCTCATCTACCATGCAGCTTCTATGGCTAAGAAAGTGTCTGGTGAAGCATTT |

\* \* \* \* \* \* \* \* \* \* \* \* \* \* \* \* \* \* \* \* \* \* \* \* \* \* \* \* \* \*

|                           |                                                                |
|---------------------------|----------------------------------------------------------------|
| <i>O.mykiss</i>           | AAGAAACGCTTTGGGCTGGCCATCACTTTGAAGTGGCAGTCCTCTTCT---AGGCCCAAG   |
| <i>S.salar</i>            | AAAAAACGCTTCGGGCTGGCCATCACTTTGAAGTGGCAGTCCTCTTCT---AGGCCCAAG   |
| <i>C.gibelio</i>          | AGGAAGCAGTACGGCATTTCATTACTGTGAAATGGATGTCCTTCTCC---AAGTCCAAG    |
| <i>D.rerio</i>            | CGGAACCGGTACGGCATTTCATCACCGTCAGATGGACTTCCTTCTCC---AAGTCCAAG    |
| <i>G.rarus</i>            | AAGAAGCAGTGCGGTATTTCATTACTGTGAGTGGACGTCCTTCTCC---AAGTCCAAG     |
| <i>M.anguillicaudatus</i> | AAGAAGCAGTACGGCATGTCCGTCACTGTAAGATGGATGACTTTCACTGCAAAGTCCAAG   |
| <i>O.latipes</i>          | AAGAAGCAGTTCTGCTTAGACATCTCTATCAAGTGGCTCTCTGCAGAG---AAGCCCAAC   |
| <i>P.olivaceus</i>        | AAGAAGCAGTTTGCACTGAATATCTCAATCGTATGGCATCCAGACGAA---TCGCTGTCT   |
| <i>O.mossambicus</i>      | AAGAAGCAGTTTACAATGTGTGTGTGTCAGTCAAGTGGCAGCCAACAGAG---AAGCCAAAC |
|                           | *** * *                                                        |
| <i>O.mykiss</i>           | CACGAAGAGCCTCCCAGACCTCCAA--AACGCCTCCTTC-----TCCCAAACCTCCCC     |
| <i>S.salar</i>            | CACGAAGAGCCTCCCAGACCTCCAA--AACCCCTCCTTCTCTCTCCCAAACCTCCTC      |
| <i>C.gibelio</i>          | CATGTCGACGAGACTG---GAGAAGATGACCGCTTTACTCCACCTGTTCTGAATCCCCCTC  |
| <i>D.rerio</i>            | CGCGTCGAGGACACTCCCCAGGAAGACAGCTGCGTAACCCCACTTGTTCTGAAGCCGCTT   |
| <i>G.rarus</i>            | CGTGTCAGGAGATGGGACAAGAAGATGACTTCTTTACCACACCTGGTCTAAACCCCTC     |
| <i>M.anguillicaudatus</i> | CATGTCGAGAAAAACGAACAAGACAACGGCCCCCTGCCCAACCCAGTCTTAAACCCCTC    |
| <i>O.latipes</i>          | CCGGACAAGCCCC-----TCCTCAGAGAGCTCCTAAAGCCCTGCTGCCGTCCCCCTC      |
| <i>P.olivaceus</i>        | CCAAACAAGCCTCCGA-AGAGCCCTCTGGCATCTCCCTGAAGCCACCATGCCACATCCT    |
| <i>O.mossambicus</i>      | CCTGACGAGCCACG---ATGCCCTCAGAAACGTGCAAAGAGCCTGTTGCCGTACACCT     |
|                           | * *                                                            |
| <i>O.mykiss</i>           | ACTGCTCCCTC-----CTCGACAGCCC-CCGGCCTCCCCTGCGCCTCGC              |
| <i>S.salar</i>            | GCTGCTCCCTC-----CTGGACAGCCC-CCGGCCTCCCCTGCACCTCGC              |
| <i>C.gibelio</i>          | CCCAAACCTC-----CATCACCCCTCCCCACCTG--CACCTCAGC--CCTTGCTT        |
| <i>D.rerio</i>            | TCTAAACCATCACTCTG-CATTATGACGTCCCAGCTCACCAGTCTCTGCTTCTCTCTT     |
| <i>G.rarus</i>            | ACTAAACCGTC-----CCTCTCCCCTCCATGCCTG--TATCCTCAGC--TCTCTCAT      |
| <i>M.anguillicaudatus</i> | TCCAAACCTT-----TCCCATCTG--CACACTCAGC--CATCCCAT                 |
| <i>O.latipes</i>          | GAAGCACCTAGGCCA-----AACCTCCCCTCGGCTGCCCCACGATTGGCTTCT          |
| <i>P.olivaceus</i>        | GAAGTCTCCAC-----AGCCCTCAGTC--CCGCCTCCACATCTCGCCCAT             |
| <i>O.mossambicus</i>      | AGGGCCCTGTCACACAGTTCTCCACAACCTCAGGC--CCGCCTTATCTCTGACCCTC      |
|                           | * *                                                            |
| <i>O.mykiss</i>           | CCAGC-----GTCAGCTCCCTGCCTTC                                    |
| <i>S.salar</i>            | CCAGC-----GTCAGCTCCCTGCCTTC                                    |
| <i>C.gibelio</i>          | C-----ATGATGTCCCAACCCAC                                        |
| <i>D.rerio</i>            | CCGGGCTGTTGGGGGTCCGACCACAGTGAGCAGAGAGATGAGATGATTCTCAACCCAC     |
| <i>G.rarus</i>            | C-----ATGATGTCCCGGCACAC                                        |
| <i>M.anguillicaudatus</i> | C-----ACATCATTCGACCCAC                                         |
| <i>O.latipes</i>          | CCCGCA-----GTCCCCACAGCCTTC                                     |
| <i>P.olivaceus</i>        | CATTAC-----CCACCCCCCAAGTTTC                                    |
| <i>O.mossambicus</i>      | CCTGCAT-----CCATACCCCGAGGTTTC                                  |
|                           | * *                                                            |
| <i>O.mykiss</i>           | TCCC-----GGGCTGTGAGGGCACCCCTCCC-----ATGGT                      |
| <i>S.salar</i>            | TCCC-----GGGCTGTGAGGGCGCCCTCTCCC-----ATGGT                     |
| <i>C.gibelio</i>          | CC-----ACTAATCCAGCCCTTCTCCG-----GGC                            |
| <i>D.rerio</i>            | CATAATGTCAAGAAATGAGCTGATTCTCAATCGTCCATAAGGCAGAGAGATGAGATGGT    |
| <i>G.rarus</i>            | CC-----CACTCTCCAGCCCTTCTCCG-----GGC                            |
| <i>M.anguillicaudatus</i> | AC-----CACCCCCAGCCCTTCACCCG-----AGC                            |
| <i>O.latipes</i>          | TGTAA-----AGCTGTGGGTGGGCC-----CCCCACACAG-----CATGATACT         |
| <i>P.olivaceus</i>        | TGCAG-----AGCAGTGGGCGGACCTACGGCCTTTTCACAC-----CCTCACTGT        |
| <i>O.mossambicus</i>      | TGCAG-----AGCAGTGGGAGGGCCACTGCTCCTCAGCTC-----TCTCACCT          |
| <i>O.mykiss</i>           | GCACGCTGCTCCTGAATCCCTC---AGGGAGGTGACCGTG-----GTGCC-----        |
| <i>S.salar</i>            | GCACGCTGCTCCTGAATCCCC---AGGGGGGCGACCATG-----GTGCC-----         |
| <i>C.gibelio</i>          | TGCTGGAGGTCCGGCTGGCTG---AGAGATGAGACGATG---CCTCGAGCC---CCTGT    |
| <i>D.rerio</i>            | TCCTCAGCTCCCCATAAGGCCG---AGAGATGGGATGGCT---CCCCAATCC---CCCAT   |
| <i>G.rarus</i>            | AGTTGGGGGTCCAACCGCCCCGCCAAGAGATGAGATGATGGCTCCTAACCCTAACCCCTGT  |
| <i>M.anguillicaudatus</i> | GGTCGGTGCTCCCGTCACCCAGCCGAGGAACGAGCCGATA-----AGTCA-----        |
| <i>O.latipes</i>          | CATGTTAAAGGCACCTCTCTCCCCCAGGGGACAAGTCA-----TGTT-----           |
| <i>P.olivaceus</i>        | CCCCACCACTTCACTTTTTCTCTTCGACGGGGGACCGAG-----TGCC-----          |
| <i>O.mossambicus</i>      | ACATGCTCTTTTCCCGATTCTCCACCCAAGGCCATCTTG-----TATT-----          |
|                           | * *                                                            |

|                           |                                                                                                                                                                                                                             |
|---------------------------|-----------------------------------------------------------------------------------------------------------------------------------------------------------------------------------------------------------------------------|
| <i>O.mykiss</i>           | TCCTGTGGATGCAGCAGCCCTGCTCCAGGGTGTGTGTGAGGTGTACGGGCAGGGGAAGCC                                                                                                                                                                |
| <i>S.salar</i>            | TCCTGTGGATGCAGCAGCCCTGCTCCAGGGTGTGTGTGAGGTGTACGGGCAGGGGAAGCC                                                                                                                                                                |
| <i>C.gibelio</i>          | GAATCAGGATGCCGTGTCTCAGCTGCAGTGGATATGTGAGCTGCACAGACTCGGCACTCC                                                                                                                                                                |
| <i>D.rerio</i>            | TAGTCTCGACGCCGTGTCTCATCTGCAGTGGATGTGCGAGGTCAACAGACTCGGCTCTCC                                                                                                                                                                |
| <i>G.rarus</i>            | GAACCGTGACACCGTATCTCAGCTGCAGAGTATGTGCGAGGCAAAACAGACTCGGTGCGCC                                                                                                                                                               |
| <i>M.anguillicaudatus</i> | AAGCCGTGACGCTGCGTCTCAGCTGAAGTGGCTCTGCGAGGTGAACAACTCGGAACGCC                                                                                                                                                                 |
| <i>O.latipes</i>          | TTCTGTGTCCCCGGTGTGTGTGCTGCGGAAGCTGAGTGAGGCGAGTGGGTGGGGGATCC                                                                                                                                                                 |
| <i>P.olivaceus</i>        | TGTTGAATCCCCAGTGATGCTCCTGAGTAAGGTGTGTGAGGTGACGGGGGTGGTTCAGCC                                                                                                                                                                |
| <i>O.mossambicus</i>      | TGCAGCATCCCCAGTGATGTTTCTCAGTAAGCTGTGTGAGACAGCAGGTGTTGGCCAGCC                                                                                                                                                                |
|                           | * *                      **                      * * * *                      **                      **                                                                                                                    |
|                           |                                                                                                                                                                                                                             |
| <i>O.mykiss</i>           | CCTCTATGACCTGCAGTACCGCCACATGGGGCCTGACGGG--TTCCTGTGCTT-CAGCTA                                                                                                                                                                |
| <i>S.salar</i>            | CCTCTATGACCTGCAGTACCGCCACATGGGGCCTGACGGG--TTCCTGTGCTT-CAGCTA                                                                                                                                                                |
| <i>C.gibelio</i>          | GCAGTATGAAGTCCGTTTCCATCGCACCAGCTCCGACGGC--TTCCTCTACTT-CAACTT                                                                                                                                                                |
| <i>D.rerio</i>            | GCAATATGAAGTCCACTTCCATCACGCGGCTCCTGACGGA--TTCCTCTACTT-CGCCTT                                                                                                                                                                |
| <i>G.rarus</i>            | ACAGTACGAAGTCCGTTTACCATCACACTGGCCCAGACGGGCTTTCTTCTACTTTTCGCTTT                                                                                                                                                              |
| <i>M.anguillicaudatus</i> | ACGATACGAAGCAGCATACAATCACATCGGTCCCGACGGC--TTTCTCTATTT-CACGTA                                                                                                                                                                |
| <i>O.latipes</i>          | AACTATGAGATGCTTTTTAGCCACGCCGCCAGATGGA--TTTCTGTACTT-CACCTA                                                                                                                                                                   |
| <i>P.olivaceus</i>        | ACGCTATGAGATGTCTACAGCCACACTGGAAGAAATGGA--TTCCTCTACTT-CGACTA                                                                                                                                                                 |
| <i>O.mossambicus</i>      | GTTTTATGAAGTGCAGTACAGCCACGCTGGGCCTGATGGA--TTCCTCTACTT-CTCCTA                                                                                                                                                                |
|                           | ** **                      *                      * *                      * *                      ** * *                      ** *                      * *                      *                                        |
|                           |                                                                                                                                                                                                                             |
| <i>O.mykiss</i>           | CCGGGTGTATGTGCCGGGGCTGGCCACACCCTTCACTGGGATGGTGCAGACACTGCCCGG                                                                                                                                                                |
| <i>S.salar</i>            | CCGGGTGTATGTGCCGGGGCTGGCCACACCCTTCACTGGGATGGTGCAGACTCTGCCCGG                                                                                                                                                                |
| <i>C.gibelio</i>          | CAAAGTCCTGGTCCCAGGCCTTCTTTTTCTCTGAACGGGGTTATCCAGATCCTTCCAGG                                                                                                                                                                 |
| <i>D.rerio</i>            | CAAAGTGCTGATCCCAGGCCTGCCGCTGCCCTGTATGGGTTCGTCCAGATCCTGCCAGG                                                                                                                                                                 |
| <i>G.rarus</i>            | CAAAGTGCTGATCCCAGGCCTCCTTCTGCCCTGTGTTCCGGGCTGTCCAGATCCTTCCAGG                                                                                                                                                               |
| <i>M.anguillicaudatus</i> | CAAGGTCAATGATCCCAGGCCTTCTTTTTCCCTGTACGGTTCTGTCCAGATCCTGCCAGG                                                                                                                                                                |
| <i>O.latipes</i>          | CAAGGTGCACGTCCCCGGAGCCCCACCACCTTCAAGGGCTTCGTCTATGATTTTACCAGG                                                                                                                                                                |
| <i>P.olivaceus</i>        | CACAGTGTGATCCCCAGGATAACCCTTCTTCAAAGGGCTGGTTCATGACCTTGCACAGG                                                                                                                                                                 |
| <i>O.mossambicus</i>      | TAAGGTGCAGATCCCGGGATCACTGCCGCTTTCAAAGGGTTGGTTCATGATCTTACCAGG                                                                                                                                                                |
|                           | **                      * *                      *                      * *                      **                      *                      **                      * *                      * *                      * |
|                           |                                                                                                                                                                                                                             |
| <i>O.mykiss</i>           | CCCCACCCTGGAGCCATACAGGAAGAGGCTCGCAGAGCTACAGCCCAGCAGGTCTCTCAG                                                                                                                                                                |
| <i>S.salar</i>            | CCCCACCCTGGAGCCATACAGGAAGAGGCTCGCAGAGCTACAGCCCAGCAGGTCTCTCAG                                                                                                                                                                |
| <i>C.gibelio</i>          | CACCAGCATTCAGCCATGAAGGCAGAGTTTATCGAGCCGCTGCCGAGCAGGTGATCCA                                                                                                                                                                  |
| <i>D.rerio</i>            | CACCAGCGCAGAGCCATGAAGAGTGAAGTTTACCGGGCCGCCGCTGAGCAGGTGATCCA                                                                                                                                                                 |
| <i>G.rarus</i>            | CACCAGCGCTCAAGCCATGAAGGGGGAAGTTGTGCGAGCCGCCGCCGAGCAGGTGATCCA                                                                                                                                                                |
| <i>M.anguillicaudatus</i> | TACGAGCGCTCGGGCCATGAAGGGGGAAGTTTCATCGAGCCACTGCTGAGCAAGTATCCA                                                                                                                                                                |
| <i>O.latipes</i>          | ACACTGCACGTCCACCATGCTGGAGGAGGCCAGGAGGGCTGCTGCCAGCAGGTCTTGCA                                                                                                                                                                 |
| <i>P.olivaceus</i>        | ACCCACTGCCAGCACCGTGCAGGAGGAAGCTGGGCAGGCTGCAGCCCAACAGGTCTTGAA                                                                                                                                                                |
| <i>O.mossambicus</i>      | TCCTAATGTCAGCACCATGCTAGAGGAGGCTCAGAAGGCTGTAGCCCAGCAGGTCTTGCA                                                                                                                                                                |
|                           | * *                      * *                      * *                      * *                      * *                      * *                      *                                                                     |
|                           |                                                                                                                                                                                                                             |
| <i>O.mykiss</i>           | CGCTCTGTACAGGG-CCTGA-----                                                                                                                                                                                                   |
| <i>S.salar</i>            | CGCTCTGTACAGGG-CCTGA-----                                                                                                                                                                                                   |
| <i>C.gibelio</i>          | AACCATGTGTAAAG-TCTCAAACCTTGCGACCTTTCTAA-----                                                                                                                                                                                |
| <i>D.rerio</i>            | AACCTTGTGCCGAG-TCTCAAATTTACGGCCTTTCTAA-----                                                                                                                                                                                 |
| <i>G.rarus</i>            | AACCATGTGCAAAGGTCTCAAATTTGCGACCTTTCTAAATTTGAGCTGTTTTGCTAAT                                                                                                                                                                  |
| <i>M.anguillicaudatus</i> | AACCATATACAGG-CTGCGCGTTGGCAACCTTTCTAA-----                                                                                                                                                                                  |
| <i>O.latipes</i>          | GAAGTTGTGCAGCA---GCGGTTTGAGCGCCTGA-----                                                                                                                                                                                     |
| <i>P.olivaceus</i>        | GAGAATTTACAACA---ACCAGTGA-----                                                                                                                                                                                              |
| <i>O.mossambicus</i>      | GAAGATGTACAACA---CTGGTCTCACACACTAA-----                                                                                                                                                                                     |
|                           | * *                                                                                                                                                                                                                         |
|                           |                                                                                                                                                                                                                             |
| <i>O.mykiss</i>           | ----                                                                                                                                                                                                                        |
| <i>S.salar</i>            | ----                                                                                                                                                                                                                        |
| <i>C.gibelio</i>          | ----                                                                                                                                                                                                                        |
| <i>D.rerio</i>            | ----                                                                                                                                                                                                                        |
| <i>G.rarus</i>            | GTAA                                                                                                                                                                                                                        |
| <i>M.anguillicaudatus</i> | ----                                                                                                                                                                                                                        |
| <i>O.latipes</i>          | ----                                                                                                                                                                                                                        |
| <i>P.olivaceus</i>        | ----                                                                                                                                                                                                                        |
| <i>O.mossambicus</i>      | ----                                                                                                                                                                                                                        |
